# Supplementary material for: Breastfeeding practices, beliefs, and social norms in low-resource communities in Mexico: Insights for how to improve future promotion strategies
Source: PubMed Central journal article supplement (PMC5495390; doi:10.1371/journal.pone.0180185), 2017-07-03
Supplement: pone.0180185.s005.pdf [file pone.0180185.s005.pdf]

[APLIQUE A MUJERES USUARIAS DE SERVICIOS DE SALUD BENEFICIARIAS DEL PROGRAMA OPORTUNIDADES –MADRES DE NIÑOS MENORES DE 1 AÑOS Y EN CONSULTA PRENATAL, DE PREFERENCIA PRIMERIZAS JÓVENES <20 AÑOS]

| 5. CARACTERISTICAS GENERALES (socio-demográficas) (APLICAR A TODAS LAS MUJERES)<br>"Primero quiero comentar con Usted sobre algunas cosas generales de su familia y hogar". |                                                                                                                                                                                                                                                                                                                                                                                                                                                                                                                                                                                                 |
|-----------------------------------------------------------------------------------------------------------------------------------------------------------------------------|-------------------------------------------------------------------------------------------------------------------------------------------------------------------------------------------------------------------------------------------------------------------------------------------------------------------------------------------------------------------------------------------------------------------------------------------------------------------------------------------------------------------------------------------------------------------------------------------------|
| 5.1 ¿Cuál es su estado civil?                                                                                                                                               | Es soltera= 1<br>Es casada= 2<br>Vive en unión libre= 3  __ <br>Es viuda= 4<br>Es separada = 5<br>Es divorciada= 6                                                                                                                                                                                                                                                                                                                                                                                                                                                                              |
| 5.2 ¿Cuál fue su último grado o año de estudios?<br><br>[Indique máximo grado de estudios concluido]                                                                        | Ninguna=1<br>Kinder o preescolar=2<br>Primaria=3<br>Secundaria=4  __ <br>Carrera Técnica=5<br>Preparatoria=6<br>Universidad=7<br>Otro=8 (especificar) _____<br>No sabe=9                                                                                                                                                                                                                                                                                                                                                                                                                        |
| 5.3 ¿Usted habla alguna lengua indígena?                                                                                                                                    | Si=1<br>No=2  __ <br>No sabe=9                                                                                                                                                                                                                                                                                                                                                                                                                                                                                                                                                                  |
| 5.4 ¿Con quién vive Ud. en su casa?<br><br>[Utilice código 1=Si; 2=No; 9=No sabe]<br><br>[Todas las casillas deberán tener dato]                                            | 1. Esposo(a) o pareja.....( )<br>2. Hijo(a)(s) .....( )<br>3. Padre o madre .....( )<br>4. Abuelo .....( )<br>5. Abuela.....( )<br>6. Hermano(s) .....( )<br>7. Hermana(s).....( )<br>8. Cuñado(a) .....( )<br>9. Yerno o nuera .....( )<br>10. Nieto(a) .....( )<br>11. Sobrino(a) .....( )<br>12. Primo(a) .....( )<br>13. Suegro .....( )<br>14. Suegra.....( )<br>14. Tío(a) .....( )<br>15. Hijo(a) adoptivo .....( )<br>16. Padrastro o madrastra .....( )<br>17. Hijastro(a) o entenado(a) .....( )<br>18. Abuelo(a) político(a) .....( )<br>88. Otro parentesco (especificar) ..... ( ) |
| 5.5 ¿Tiene radio en su casa?                                                                                                                                                | Si=1<br>No=2  __ <br>No sabe=9                                                                                                                                                                                                                                                                                                                                                                                                                                                                                                                                                                  |
| 5.6 Usted ¿escucha alguna vez la radio?                                                                                                                                     | Si=1<br>No=2 } Pase a 5.10<br>No sabe=9 }  __                                                                                                                                                                                                                                                                                                                                                                                                                                                                                                                                                   |
| 5.7 ¿Cuántos días a la semana escucha la radio?                                                                                                                             | __  días por semana<br>8= Otro (especificar) _____<br>9= No sabe /No recuerda /No responde                                                                                                                                                                                                                                                                                                                                                                                                                                                                                                      |
| 5.8 ¿Qué clase de programa de radio escucha Usted <b>más seguido</b> ?<br><br>[ANOTE LAS DOS MÁS IMPORTANTES]                                                               | 1= Noticias<br>2= Música<br>3= Infantil  __ <br>4= Religioso<br>5= Deportes  __ <br>6= Radionovela<br>7= Temas de salud o enfermedad<br>8= Otro (especificar) _____<br>9= No sabe /No recuerda /No responde                                                                                                                                                                                                                                                                                                                                                                                     |

|                                                                                                                                                                |                                                                                                                                                                                                                                                                                           |
|----------------------------------------------------------------------------------------------------------------------------------------------------------------|-------------------------------------------------------------------------------------------------------------------------------------------------------------------------------------------------------------------------------------------------------------------------------------------|
| <p>5.9 Generalmente, ¿A qué hora escucha radio?</p> <p><b>[Utilice código 1=Si; 2=No; 9=No sabe]</b></p> <p><i>[Todas las casillas deberán tener dato]</i></p> | <p>1= 0:00 - 5:59 hrs.....( )</p> <p>2= 6:00 - 8:59 hrs.....( )</p> <p>3= 9:00 - 11:59 hrs.....( )</p> <p>4= 12:00 - 14:59 hrs.....( )</p> <p>5= 15:00 - 17:59 hrs.....( )</p> <p>6= 18:00 - 23:59 hrs.....( )</p> <p>8= Otro (especificar) _____...( )</p>                               |
| <p>5.10 Usted ¿tiene televisión en su casa?</p>                                                                                                                | <p>Si=1</p> <p>No=2 <input type="checkbox"/></p> <p>No sabe=9 <input type="checkbox"/></p>                                                                                                                                                                                                |
| <p>5.11 Usted ¿Ve alguna vez la televisión?</p>                                                                                                                | <p>Si=1</p> <p>No=2 } <b>Pase a 5.16</b> <input type="checkbox"/></p> <p>No sabe=9 }</p>                                                                                                                                                                                                  |
| <p>5.12 ¿Cuántos días a la semana ve televisión?</p>                                                                                                           | <p><input type="checkbox"/> días por semana</p> <p>8= Otro (especificar) _____</p> <p>9= No sabe /No recuerda /No responde</p>                                                                                                                                                            |
| <p>5.13 ¿Qué canales de televisión ve Usted con más frecuencia?</p> <p><b>[ANOTE LAS DOS MÁS IMPORTANTES, EL CÓDIGO SE ASIGNARÁ EN CAPTURAS]</b></p>           | <p>1. _____ <input type="checkbox"/></p> <p>2. _____ <input type="checkbox"/></p> <p>8= No aplica/No procede/Nunca ve televisión</p> <p>9= No sabe /No recuerda /No responde</p>                                                                                                          |
| <p>5.14 ¿Qué clase de programa ve Usted <b>más seguido</b> en la televisión?</p> <p><b>[ANOTE LAS DOS MÁS IMPORTANTES]</b></p>                                 | <p>1= Noticias</p> <p>2= Música</p> <p>3= Infantil <input type="checkbox"/></p> <p>4= Religioso</p> <p>5= Deportes <input type="checkbox"/></p> <p>6= Telenovela</p> <p>7= Temas de salud o enfermedad</p> <p>8= Otro (especificar) _____</p> <p>9= No sabe /No recuerda /No responde</p> |
| <p>5.15 Generalmente ¿A qué hora ve televisión?</p> <p><b>[Utilice código 1=Si; 2=No; 9=No sabe]</b></p> <p><i>[Todas las casillas deberán tener dato]</i></p> | <p>1= 0:00 - 5:59 hrs.....( )</p> <p>2= 6:00 - 8:59 hrs.....( )</p> <p>3= 9:00 - 11:59 hrs.....( )</p> <p>4= 12:00 - 14:59 hrs.....( )</p> <p>5= 15:00 - 17:59 hrs.....( )</p> <p>6= 18:00 - 23:59 hrs.....( )</p> <p>8= Otro (especificar) _____...( )</p>                               |
| <p>5.16 Usted ¿tiene computadora en su casa?</p>                                                                                                               | <p>Si=1</p> <p>No=2 <input type="checkbox"/></p> <p>No sabe=9 <input type="checkbox"/></p>                                                                                                                                                                                                |
| <p>5.17 Usted ¿Alguna vez usa una computadora con internet (donde sea)?</p>                                                                                    | <p>Si=1</p> <p>No=2 } <b>Pase a 5.21</b> <input type="checkbox"/></p> <p>No sabe=9 }</p>                                                                                                                                                                                                  |
| <p>5.18 ¿Cuántos días a la semana usa computadora con internet?</p>                                                                                            | <p><input type="checkbox"/> días por semana</p> <p>8= Otro (especificar) _____</p> <p>9= No sabe /No recuerda /No responde</p>                                                                                                                                                            |
| <p>5.19 ¿Qué páginas de internet usa Usted con más frecuencia?</p> <p><b>[ANOTE LAS DOS MÁS IMPORTANTES, EL CÓDIGO SE ASIGNARÁ EN CAPTURAS]</b></p>            | <p>1. _____ <input type="checkbox"/></p> <p>2. _____ <input type="checkbox"/></p> <p>8= No aplica/No procede/Nunca usa internet</p> <p>9= No sabe /No recuerda /No responde</p>                                                                                                           |

|                                                                                                                                                                                                                                                                                       |                                                                                                                                                                                                                                                                                                             |
|---------------------------------------------------------------------------------------------------------------------------------------------------------------------------------------------------------------------------------------------------------------------------------------|-------------------------------------------------------------------------------------------------------------------------------------------------------------------------------------------------------------------------------------------------------------------------------------------------------------|
| <p>5.20 ¿Qué clase de información busca Usted más seguido en internet?</p> <p>[ANOTE LAS DOS MÁS IMPORTANTES]</p>                                                                                                                                                                     | <p>1= Noticias</p> <p>2= Entretenimiento (deporte, música)  __ </p> <p>3= Correo electrónico</p> <p>4= Redes sociales  __ </p> <p>5= Temas de salud o enfermedad</p> <p>8= Otro (especificar) _____</p> <p>9= No sabe /No recuerda /No responde</p>                                                         |
| <p>5.21 ¿Usted tiene teléfono celular (personal o en su casa)?</p>                                                                                                                                                                                                                    | <p>Si=1</p> <p>No=2  __ </p> <p>No sabe=9</p>                                                                                                                                                                                                                                                               |
| <p>5.22 ¿Alguna vez usa Usted el teléfono celular?</p>                                                                                                                                                                                                                                | <p>Si=1</p> <p>No=2 } <b>Pase a 5.25</b>  __ </p> <p>No sabe=9 }</p>                                                                                                                                                                                                                                        |
| <p>5.23 ¿Cada cuánto usa el teléfono celular?</p>                                                                                                                                                                                                                                     | <p> __  días por semana</p> <p>8= Otro (especificar) _____</p> <p>9= No sabe /No recuerda /No responde</p>                                                                                                                                                                                                  |
| <p>5.24 Usted ¿qué clase de publicidad o anuncios recibe más seguido en el teléfono celular?</p> <p>[ANOTE LAS DOS MÁS IMPORTANTES]</p>                                                                                                                                               | <p>1= Noticias</p> <p>2= Entretenimiento (música, deportes, etc.)  __ </p> <p>3= Temas de salud o enfermedad</p> <p>4= Mensajes de su compañía telefónica  __ </p> <p>8= Otro (especificar) _____</p> <p>9= No sabe /No recuerda /No responde</p>                                                           |
| <p>5.25 ¿Ha visto o escuchado algún mensaje relacionado con <b>dar pecho</b> al bebé o a su bebé?</p>                                                                                                                                                                                 | <p>Si=1</p> <p>No=2 } <b>Pase a 5.28</b>  __ </p> <p>No sabe/no recuerda=9 }</p>                                                                                                                                                                                                                            |
| <p>5.26 ¿Dónde fue la última vez que <b>vio o escuchó</b> un mensaje relacionado con <b>dar pecho</b> al bebé?</p> <p>[No lea, ni sugiera, registre la que indique el encuestado]</p> <p><b>Encuestador: En caso de que NO REFIERA la opción 06, 07 u 08, PASAR A PREG. 5.27.</b></p> | <p>Televisión.....01</p> <p>Radio.....02</p> <p>Periódico/revista.....03  __   __ </p> <p>Internet.....04</p> <p>Calle o avenida (cartel, anuncio).....05</p> <p>Hospital .....06</p> <p>Clínica privada.....07</p> <p>Centro de Salud.....08</p> <p>Otro...88 (especificar)_____</p> <p>No sabe.....99</p> |
| <p>5.26a En caso que haya referido la opción 06, 07 u 08 en la pregunta anterior, especificar quién se lo dio.</p> <p>(El código se asignará en la captura)</p>                                                                                                                       | <p>¿Quién se lo dió? _____  __ </p>                                                                                                                                                                                                                                                                         |
| <p>5.27 ¿Cuándo fue la última vez que <b>vio o escuchó</b> un mensaje relacionado con <b>dar pecho</b> al bebé en televisión, radio o periódicos?</p> <p>[No lea, ni sugiera, registre la que indique el encuestado]</p>                                                              | <p>En los últimos 7 días.....1</p> <p>Hace más de 7 días, pero menos de 1 mes....2</p> <p>Entre 1 y 3 meses.....3</p> <p>Entre 3 y 6 meses.....4  __ </p> <p>Hace más de 6 meses.....5</p> <p>Nunca.....6</p> <p>No sabe.....9</p>                                                                          |
| <p>5.28 ¿Ha visto o escuchado algún mensaje relacionado con <b>leche de fórmula o leche de bote (tipo Nido)</b> para alimentar al bebé?</p>                                                                                                                                           | <p>Si=1</p> <p>No=2 } <b>Pase a Secc. 6</b>  __ </p> <p>No sabe/no recuerda=9 }</p>                                                                                                                                                                                                                         |

|                                                                                                                                                                                                                                                                                                                                                         |                                                                                                                                                                                                                                                                                                                                       |
|---------------------------------------------------------------------------------------------------------------------------------------------------------------------------------------------------------------------------------------------------------------------------------------------------------------------------------------------------------|---------------------------------------------------------------------------------------------------------------------------------------------------------------------------------------------------------------------------------------------------------------------------------------------------------------------------------------|
| <p>5.29 ¿Dónde fue la última vez que <b>vio o escuchó</b> un mensaje relacionado con leche de fórmula o leche de bote (<b>tipo Nido</b>) de leche para alimentar al bebé?</p> <p><i>[No lea, ni sugiera, registre la que indique el encuestado]</i></p> <p><b>Encuestador: En caso de que NO REFIERA la opción 06, 07 u 08, PASAR A PREG. 5.30.</b></p> | <p>Televisión.....01</p> <p>Radio.....02</p> <p>Periódico/revista.....03  __ __ </p> <p>Internet.....04</p> <p>Calle o avenida (cartel, anuncio).....05</p> <p>Hospital .....06</p> <p>Clínica privada.....07</p> <p>Centro de Salud.....08</p> <p>Otro... 88 (especificar)_____</p> <p>No sabe.....99</p>                            |
| <p>5.29a En caso que haya referido la opción 06, 07 u 08 en la pregunta anterior, especificar quién se lo dio.<br/><i>(El código se asignará en la captura)</i></p>                                                                                                                                                                                     | <p>¿Quién se lo dio? _____  __ </p>                                                                                                                                                                                                                                                                                                   |
| <p>5.30 ¿Cuándo fue la última vez que <b>vio o escuchó</b> un mensaje relacionado con leche de fórmula o bote para alimentar al bebé en televisión, radio o periódicos?</p> <p><i>[No lea, ni sugiera, registre la que indique el encuestado]</i></p>                                                                                                   | <p>En los últimos 7 días.....1</p> <p>Hace más de 7 días, pero menos de 1 mes...2</p> <p>Entre 1 y 3 meses.....3</p> <p>Entre 3 y 6 meses.....4  __ </p> <p>Hace más de 6 meses.....5</p> <p>Nunca.....6</p> <p>No sabe.....9</p>                                                                                                     |
| <p><b>6.SECCIÓN INFORMACIÓN PRENATAL (APLICAR A TODAS LAS MUJERES)</b><br/> <b>“Ahora me gustaría hablar con Usted sobre dónde lleva o llevó el control de su embarazo de [NOMBRE]”.</b></p>                                                                                                                                                            |                                                                                                                                                                                                                                                                                                                                       |
| <p>6.1 ¿Dónde realiza (realizó) el control de su embarazo?</p> <p><i>[No lea, ni sugiera, registre la que indique el encuestado]</i></p>                                                                                                                                                                                                                | <p>Centro de salud de la SSA.....1</p> <p>Clínica del IMSS <i>Oportunidades</i>.....2</p> <p>Hospital de la SSA.....3  __ </p> <p>Partera.....4</p> <p>Consultorio o clínica privada.....5</p> <p>Otro=8 (especificar)_____</p> <p>No sabe.....9</p>                                                                                  |
| <p>6.2 Durante su embarazo ¿Alguien le habló (o le han hablado) sobre dar pecho a su bebé mientras estaba embarazada?</p>                                                                                                                                                                                                                               | <p>Si=1</p> <p>No=2 } <b>Pase a 6.5</b>  __ </p> <p>No sabe=9 }</p>                                                                                                                                                                                                                                                                   |
| <p>6.3 ¿En dónde le hablaron sobre dar pecho a su bebé?</p> <p><i>[No lea, ni sugiera, registre la que indique el encuestado]</i></p>                                                                                                                                                                                                                   | <p>Centro de Salud de SSA.....1</p> <p>Clínica del IMSS.....2</p> <p>Hospital de la SSA.....3</p> <p>Partera.....4  __ </p> <p>Talleres de Oportunidades.....5</p> <p>Talleres del Seguro Popular (“yo puedo, yo quiero”).....6</p> <p>Consultorio o Clínica Privada.....7</p> <p>Otro =8 (especificar)_____</p> <p>No sabe.....9</p> |
| <p>6.4 Durante su embarazo ¿Quién le habló sobre dar pecho a su bebé?</p> <p><i>[Registre la más importante. No lea, ni sugiera, registre la que indique el encuestado]</i></p>                                                                                                                                                                         | <p>Médico.....01</p> <p>Enfermera.....02</p> <p>Promotor de Salud.....03</p> <p>Auxiliar en Salud.....04  __ __ </p> <p>Vocal de Oportunidades.....05</p> <p>Partera.....06</p> <p>Madre.....07</p> <p>Suegra.....08</p> <p>Familiar (hermana, tía, etc.).....09</p> <p>Otro=88 (especificar)_____</p> <p>No sabe.....99</p>          |

|                                                                                                                                                                                                                            |                                                                                                                                                                                                                                                                                                                      |
|----------------------------------------------------------------------------------------------------------------------------------------------------------------------------------------------------------------------------|----------------------------------------------------------------------------------------------------------------------------------------------------------------------------------------------------------------------------------------------------------------------------------------------------------------------|
| 6.5 Durante su embarazo ¿Alguien le recomendó dar leche de fórmula (o bote) a su bebé?                                                                                                                                     | Si=1<br>No=2 } <b>Pase a 6.8</b><br>No sabe=9 }  __                                                                                                                                                                                                                                                                  |
| 6.6 Durante su embarazo ¿En dónde le hablaron sobre alimentar con leche de fórmula a su bebé?<br><br>[No lea, ni sugiera, registre la que indique el encuestado]                                                           | Centro de Salud de SSA.....1<br>Clínica del IMSS <i>Oportunidades</i> .....2<br>Hospital de la SSA.....3<br>Partera.....4  __ <br>Talleres de Oportunidades.....5<br>Talleres del Seguro Popular (“yo puedo, yo quiero”).....6<br>Consultorio o Clínica Privada.....7<br>Otro=8 (especificar) _____<br>No sabe.....9 |
| 6.7 Durante su embarazo ¿Quién le habló sobre dar leche de fórmula a su bebé?<br><br>[No lea, ni sugiera, registre la que indique el encuestado]                                                                           | Médico.....01<br>Enfermera.....02<br>Promotor de salud.....03<br>Auxiliar en salud.....04  __   __ <br>Vocal de Oportunidades.....05<br>Partera.....06<br>Madre.....07<br>Suegra.....08<br>Familiar (hermana, tía, etc.).....09<br>Otro=88 (especificar) _____<br>No sabe.....99                                     |
| 6.8 Para Usted, ¿Qué es dar de comer <u>sólo</u> pecho a su bebé?<br><br>(Utilice sinónimos, como: <i>puro, solamente, únicamente, exclusivamente</i> dar pecho)                                                           | Dar sólo pecho, no incluir agua ni otros líquidos u otra leche=1<br>Dar sólo pecho, no otra leche=2<br>Dar pecho más agua o té=3  __ <br>Dar pecho y fórmula=4<br>Dar pecho y ocasionalmente probaditas de alimentos=5<br>Otro (especificar)=8 _____<br>No sabe=9                                                    |
| 6.9 ¿Durante el embarazo Usted planea(ó) dar <u>sólo</u> pecho a su bebé sin darle líquidos, ni otra leche, ni probaditas de alimentos?<br><br>[INDAGAR SOBRE LACTANCIA MATERNA EXCLUSIVA, <i>sólo dar pecho al bebé</i> ] | Si=1<br>No=2 } <b>Pase a 6.11</b><br>No sabe=9 }  __                                                                                                                                                                                                                                                                 |
| 6.10 ¿Por cuánto tiempo planea(ó) dar <u>sólo</u> pecho a su bebé, sin darle líquidos, ni otra leche, ni probaditas de alimentos?                                                                                          | __   __  meses<br>No responde o no especifica = 99                                                                                                                                                                                                                                                                   |
| 6.11 ¿Por cuánto tiempo planea (o planeó) dar pecho a su bebé junto con otros alimentos?                                                                                                                                   | __   __  meses<br>No responde o no especifica = 99                                                                                                                                                                                                                                                                   |
| 6.12 Durante su embarazo ¿Ud. planea (o planeó) dar fórmula u otra leche (diferente a la materna) a su bebé?                                                                                                               | Si=1<br>No=2 } <b>Pase a 6.16</b><br>No sabe=9 }  __                                                                                                                                                                                                                                                                 |
| 6.13 Durante su embarazo ¿Cuál fórmula o leche planea(ó) dar a su bebé?                                                                                                                                                    | Licons=1<br>Nido=2  __ <br>Nan, Enfamil, Enfagrow, Nursoy, etc. =3<br>Leche Lala, Alpura, etc.=4<br>Otro=8 (esp) _____<br>No sabe/ no recuerda=9                                                                                                                                                                     |
| 6.14 Durante su embarazo ¿Hasta a qué edad planea(ó) dar fórmula a su bebé?                                                                                                                                                | __   __  meses<br>No responde o no especifica = 99                                                                                                                                                                                                                                                                   |

|                                                                                                                                                                                                                                                                       |                                                                                                                                                                                                                                                                                                                                                                  |
|-----------------------------------------------------------------------------------------------------------------------------------------------------------------------------------------------------------------------------------------------------------------------|------------------------------------------------------------------------------------------------------------------------------------------------------------------------------------------------------------------------------------------------------------------------------------------------------------------------------------------------------------------|
| <p>6.15 ¿Por qué planea(ó) dar fórmula u otra leche (diferente a la materna) a su bebé?</p> <p><i>[Registre la más importante. No lea, ni sugiera, registre la que indique el encuestado]</i></p>                                                                     | <p>Porque trabaja.....1  __ </p> <p>Porque es lo mejor para el bebé.....2</p> <p>Porque alimenta al bebe.....3</p> <p>Porque sólo el pecho no lo llena.....4</p> <p>Porque llena .....5</p> <p>Porque es fácil de preparar.....6</p> <p>Porque lo recomendó el médico/enfermera.....7</p> <p>Otro (especificar).....8</p> <p>No sabe.....9</p>                   |
| <p><b>Ahora me gustaría hablar sobre algunos aspectos de salud que presenta (o presentó) durante su embarazo (con NOMBRE)".</b></p>                                                                                                                                   |                                                                                                                                                                                                                                                                                                                                                                  |
| <p>6.16 Usted ¿sabe cuánto mide de estatura?</p> <p>[ENCUESTADOR REGISTRE EN METROS Y CM.]</p>                                                                                                                                                                        | <p>Si=1</p> <p>No=2  __ </p> <p>No sabe=9</p> <p>Si contesto <b>código 1</b>, pregunte y registre: ¿Cuánto?</p> <p>Talla  __ . __ __ mts</p> <p>No recuerda = 9.99</p>                                                                                                                                                                                           |
| <p>6.17 Usted ¿sabe cuál fue su peso antes o al inicio del embarazo (primer trimestre)?</p>                                                                                                                                                                           | <p>Si=1</p> <p>No=2  __ </p> <p>No sabe=9</p> <p>Si contesto <b>código 1</b>, pregunte y registre: ¿Cuánto?</p> <p>Peso  __ _ __ _ . __ _ __ kgs</p> <p>No recuerda = 999.99</p>                                                                                                                                                                                 |
| <p>6.18 ¿Le dijeron cuánto subió o cuántos kilos ganó (o ha ganado) durante el embarazo?</p>                                                                                                                                                                          | <p>Si=1</p> <p>No=2  __ </p> <p>No sabe=9 } <b>Pase a siguiente Secc.</b></p> <p>Peso ganado __ _ __ _ . __ _ __ kgs</p> <p><b>(Anotar el peso que comenta la señora que ganó en su último embarazo o que ha ganado en el embarazo actual).</b></p> <p>No sabe o no recuerda = 99.99]</p>                                                                        |
| <p><b>7. Sección Lactancia Materna Exclusiva (LME)</b><br/> <b>[APLIQUE A TODAS LAS MUJERES ENCUESTADAS] NOMBRE=_____</b><br/> <b>"Ahora me gustaría hablar sobre la alimentación de su bebé o de [NOMBRE] en los primeros meses de vida".</b></p>                    |                                                                                                                                                                                                                                                                                                                                                                  |
| <p>7.1 ¿Usted sabe o le han dicho por cuánto tiempo se recomienda dar <u>sólo</u> pecho después que nace el bebé, sin agua, té u otros líquidos?</p>                                                                                                                  | <p>Si=1</p> <p>No=2  __ </p> <p>No sabe/no recuerda=9 } <b>Pase a 7.3</b></p>                                                                                                                                                                                                                                                                                    |
| <p>7.2 ¿Cuánto tiempo después que nace el bebé le han dicho o ha escuchado que se debe dar <u>sólo</u> pecho al bebé (sin agua, te u otros líquidos)?</p>                                                                                                             | <p> __ _ __  meses</p> <p>No sabe, no recuerda = 99</p>                                                                                                                                                                                                                                                                                                          |
| <p>7.3 Usted, ¿Qué opina de darle <u>sólo</u> pecho a su bebé por <b>6 meses?</b></p>                                                                                                                                                                                 | <p>Está de acuerdo= 1</p> <p>No está de acuerdo=2 →<b>Pase a 7.6</b>  __ </p> <p>No sabe=9 →<b>Pase a 7.8</b></p>                                                                                                                                                                                                                                                |
| <p>7.4 ¿Por qué está de acuerdo en darle <u>sólo</u> pecho a su bebé por 6 meses (sin agua ni ningún líquido, ni otra leche, ni probaditas de alimentos)?</p> <p><i>[REGISTRE LOS PRIMEROS TRES QUE MENCIONE]</i></p> <p><i>[Cancele casillas que no utilice]</i></p> | <p>Porque es lo mejor para el bebé=01  __ _ __ </p> <p>Porque es suficiente y adecuada=02</p> <p>Porque está bien=03  __ _ __ </p> <p>Porque le da defensas contra enfermedades=04</p> <p>Porque se le da amor=05  __ _ __ </p> <p>Porque es barato y práctico=06</p> <p>Porque lo nutre y ayuda en su crecimiento=07</p> <p>Otro (esp)=08</p> <p>No sabe=99</p> |
| <p>7.5 De lo que me acaba de mencionar, ¿Cuál opinión sería la más importante para Usted?</p> <p><i>[Si sólo menciona una repita el código]</i></p>                                                                                                                   | <p> __ _ __ </p> <p><b>[AL TERMINAR PASE A 7.8]</b></p>                                                                                                                                                                                                                                                                                                          |

|                                                                                                                                                                                                                                                                                                                                                                |                                                                                                                                                                                                                                                                                                                                                                             |
|----------------------------------------------------------------------------------------------------------------------------------------------------------------------------------------------------------------------------------------------------------------------------------------------------------------------------------------------------------------|-----------------------------------------------------------------------------------------------------------------------------------------------------------------------------------------------------------------------------------------------------------------------------------------------------------------------------------------------------------------------------|
| <p>7.6 ¿Por qué está en desacuerdo en darle <u>sólo</u> pecho a su bebé por 6 meses (sin agua ni ningún líquido, ni otra leche, ni probaditas de alimentos)?</p> <p>[REGISTRE LOS PRIMEROS TRES QUE MENCIONE]</p> <p>[Cancele casillas que no utilice]</p>                                                                                                     | <p>Porque no tengo suficiente leche=01</p> <p>Porque se quedaría con hambre=02</p> <p>Porque le daría sed=03</p> <p>Porque no se alimentaría bien=04</p> <p>Porque no crecería lo suficiente bien=05</p> <p>Porque no está bien=06</p> <p>Porque la madre trabaja=07</p> <p>Porque es cansado dar pecho al bebe=08</p> <p>Otro (especifique)=88 _____</p> <p>No sabe=99</p> |
| <p>7.7 De lo que me acaba de mencionar, ¿Cuál opinión sería la más importante para Usted?</p> <p>[Si sólo menciona <b>una</b> repita el código]</p>                                                                                                                                                                                                            | <p> __ __ </p>                                                                                                                                                                                                                                                                                                                                                              |
| <p>7.8 Para los primeros SEIS meses de vida, ¿Usted planea (o planeó) darle <u>sólo</u> pecho al niño(a) (sin agua ni ningún líquido, ni otra leche, ni probaditas de alimentos)?</p> <p>[MUESTRE TARJETA DE OPCIONES DE RESPUESTA]</p>                                                                                                                        | <p>No planea(ó) dar lactancia materna (LM) = 1</p> <p>Estoy pensando (o pensó) en dar LM = 2</p> <p>Estoy dando (o dió) LM = 3</p> <p>Voy a seguir (o siguió) dando LM = 4</p> <p>Otra respuesta diferente = 5</p>                                                                                                                                                          |
| <p>7.9 ¿Por cuánto tiempo planea(ó) dar <u>sólo</u> leche materna a su hijo(a) (sin agua ni ningún líquido, ni otra leche, ni probaditas de alimentos)?</p>                                                                                                                                                                                                    | <p> __ __  meses</p> <p>99= No sabe/ no responde</p>                                                                                                                                                                                                                                                                                                                        |
| <p>7.10 ¿Alguien puede opinar o hacerle cambiar de idea sobre la alimentación del bebé?</p>                                                                                                                                                                                                                                                                    | <p>Si=1</p> <p>No=2</p> <p>No sabe=9 } <b>Pase a 7.12</b></p>                                                                                                                                                                                                                                                                                                               |
| <p>7.11 ¿Quién podría aconsejarla para cambiar la alimentación del bebé?</p> <p>[REGISTRE HASTA TRES OPCIONES DE RESPUESTA, en orden de importancia]</p>                                                                                                                                                                                                       | <p>Nadie, ella misma=01</p> <p>Esposo/pareja=02</p> <p>Madre=03</p> <p>Suegra=04</p> <p>Amiga/vecina=05</p> <p>Vocal de Oportunidades=06</p> <p>Auxiliar de salud=07</p> <p>Médico=08</p> <p>Enfermera=09</p> <p>Pediatra ,especialista, nutriólogo= 10</p> <p>Otro (especifique)=88 _____</p> <p>No sabe=99</p>                                                            |
| <p><b>[APLIQUE SI LA ENCUESTADA REFIERE TENER PAREJA O ESPOSO, DE LO CONTRARIO PASE A PREG. 7.13]</b></p> <p>7.12 Para Usted, ¿Qué tan importante es lo que piense su <b>esposo/pareja</b> sobre dar <u>sólo</u> pecho (sin agua, ni ningún líquido, ni otra leche, ni probaditas de alimentos) al bebé?</p> <p>[MUESTRE TARJETA DE OPCIONES DE RESPUESTA]</p> | <p>Muy importante=4</p> <p>Importante=3</p> <p>Poco importante=2</p> <p>Nada importante=1</p> <p>No sabe=9</p>                                                                                                                                                                                                                                                              |
| <p>7.13 Para Usted, ¿Qué tan importante es lo que piense su <b>madre</b> sobre dar <u>sólo</u> pecho (sin agua ni ningún líquido, ni otra leche, ni probaditas de alimentos)?</p> <p>[MUESTRE TARJETA DE OPCIONES DE RESPUESTA]</p>                                                                                                                            | <p>Muy importante=4</p> <p>Importante=3</p> <p>Poco importante=2</p> <p>Nada importante=1</p> <p>No sabe=9</p>                                                                                                                                                                                                                                                              |
| <p>7.14 Para Usted, ¿Qué tan importante es lo que piense su <b>suegra</b> sobre dar <u>sólo</u> pecho (sin agua ni ningún líquido, ni otra leche, ni probaditas de alimentos)?</p> <p>[MUESTRE TARJETA DE OPCIONES DE RESPUESTA]</p>                                                                                                                           | <p>Muy importante=4</p> <p>Importante=3</p> <p>Poco importante=2</p> <p>Nada importante=1</p> <p>No sabe=9</p>                                                                                                                                                                                                                                                              |

|                                                                                                                                                                                                                                               |                                                                                                                                                                                                                                                                                                                                                                                                                                                                                                                          |
|-----------------------------------------------------------------------------------------------------------------------------------------------------------------------------------------------------------------------------------------------|--------------------------------------------------------------------------------------------------------------------------------------------------------------------------------------------------------------------------------------------------------------------------------------------------------------------------------------------------------------------------------------------------------------------------------------------------------------------------------------------------------------------------|
| <p>7.15 Para Usted, ¿Qué tan importante es lo que piense <b>su médico</b> sobre dar <u>sólo</u> pecho (sin agua ni ningún líquido, ni otra leche, ni probaditas de alimentos)?</p> <p>[MUESTRE TARJETA DE OPCIONES DE RESPUESTA]</p>          | <p>Muy importante=4<br/> Importante=3 <input type="text"/><br/> Poco importante=2<br/> Nada importante=1<br/> No sabe=9</p>                                                                                                                                                                                                                                                                                                                                                                                              |
| <p>7.16 Para Usted, ¿Qué tan importante es lo que piense <b>su enfermera</b> sobre dar <u>sólo</u> pecho (sin agua ni ningún líquido, ni otra leche, ni probaditas de alimentos)?</p> <p>[MUESTRE TARJETA DE OPCIONES DE RESPUESTA]</p>       | <p>Muy importante=4<br/> Importante=3 <input type="text"/><br/> Poco importante=2<br/> Nada importante=1<br/> No sabe=9</p>                                                                                                                                                                                                                                                                                                                                                                                              |
| <p>7.17 ¿Usted a quién <b>le</b> pregunta o le hace <b>más</b> caso en relación a la alimentación de su hijo(a)?</p> <p>[Si menciona que a <b>NADIE</b>, escribirlo en 8]</p>                                                                 | <p>Esposo=1<br/> Madre=2 <input type="text"/><br/> Suegra=3<br/> Hermana/tía=4<br/> Médico=5<br/> Enfermera=6<br/> Otro (esp)=8 _____<br/> No sabe/no responde=9</p> <p><b>SI NO RESPONDE ALGÚN FAMILIAR, PREGUNTE: DE LOS FAMILIARES ¿CUAL SERÍA EL MÁS IMPORTANTE? Código <input type="text"/></b></p>                                                                                                                                                                                                                 |
| <p><b>PREGUNTE EN REFERENCIA AL FAMILIAR QUIÉN CONSIDERA MÁS IMPORTANTE EN LA PREGUNTA ANTERIOR.</b></p>                                                                                                                                      |                                                                                                                                                                                                                                                                                                                                                                                                                                                                                                                          |
| <p>7.18 Usted ¿Qué cree que diría su <b>familiar</b> si le diera <u>sólo</u> pecho (sin agua, ni ningún líquido, ni otra leche, ni probaditas de alimentos) a su hijo(a) por <b>6 meses</b>?</p>                                              | <p>Está de acuerdo= 1 →Pase a 7.21 <input type="text"/><br/> No está de acuerdo=2<br/> No sabe=9</p>                                                                                                                                                                                                                                                                                                                                                                                                                     |
| <p>7.19 ¿Por qué no está de acuerdo su <b>familiar</b> de que se le diera <u>sólo</u> pecho a su hijo(a) por 6 meses?</p> <p>[REGISTRE LOS PRIMEROS TRES QUE MENCIONE en orden de prioridad]</p> <p>[cancele casilla(s) si no la utiliza]</p> | <p>Porque se queda con hambre=01<br/> Porque no lo cuida bien=02 <input type="text"/><input type="text"/><br/> Porque le debe dar también otra leche=03<br/> Porque le debe dar también agua o té=04 <input type="text"/><input type="text"/><br/> Porque también debe comer otros alimentos=05<br/> Porque la madre se debilita=06 <input type="text"/><input type="text"/><br/> Porque tiene que trabajar=07<br/> Nada, no opina=08<br/> No estaría de acuerdo=09<br/> Otro=88 (especificar) _____<br/> No sabe=99</p> |
| <p>7.20 Si dio más de una respuesta: ¿Cuál opinión sería la más importante para su <b>familiar</b>?</p> <p>[Si solo menciona <b>una</b> repita el código]</p>                                                                                 | <p><input type="text"/><input type="text"/></p>                                                                                                                                                                                                                                                                                                                                                                                                                                                                          |
| <p>7.21 Usted ¿cree que puede dar (o hubiera podido dar) <u>sólo</u> pecho (sin agua, ni ningún líquido, ni otra leche, ni probaditas de alimentos) a su hijo por <b>6 meses</b>?</p>                                                         | <p>Si=1 →Pase a 7.24<br/> No=2 <input type="text"/><br/> No sabe=9</p>                                                                                                                                                                                                                                                                                                                                                                                                                                                   |
| <p>7.22 ¿Por qué piensa que no puede dar <u>sólo</u> pecho (sin agua, ni ningún líquido, ni otra leche, ni probaditas de alimentos) por <b>6 meses</b> a su bebé?</p> <p>[REGISTRE LOS PRIMEROS TRES QUE MENCIONE]</p>                        | <p>Porque está baja de peso=01<br/> Porque no tiene mucha leche=02 <input type="text"/><input type="text"/><br/> Porque trabaja=03<br/> Porque no quiere=04 <input type="text"/><input type="text"/><br/> Porque el niño(a) necesita agua=05<br/> Porque el niño(a) necesita té para cólicos=06 <input type="text"/><input type="text"/><br/> Porque el niño(a) no crece=07<br/> Porque el niño(a) pide otros alimentos=08<br/> Otro =88 (especificar) _____<br/> No sabe=99</p>                                         |

|                                                                                                                                                                                                                                                                           |                                                                                                                                                                                                                                                                                                                                                                                                                                                                            |
|---------------------------------------------------------------------------------------------------------------------------------------------------------------------------------------------------------------------------------------------------------------------------|----------------------------------------------------------------------------------------------------------------------------------------------------------------------------------------------------------------------------------------------------------------------------------------------------------------------------------------------------------------------------------------------------------------------------------------------------------------------------|
| <p>7.23 De las que mencionó, ¿Cuál considera que es la razón más importante por la que Usted no puede dar <u>sólo</u> pecho a su bebé por 6 meses?</p> <p><i>[Si sólo menciona una repita el código]</i></p>                                                              | <p> _ _ _ </p>                                                                                                                                                                                                                                                                                                                                                                                                                                                             |
| <p>7.24 ¿Cuáles cree Usted que son los <b>beneficios/ventajas</b> para el <b>bebé</b> de recibir <u>sólo</u> pecho (sin agua, ni ningún líquido, ni otra leche, ni probaditas de alimentos) por <b>6 meses</b>?</p> <p>[REGISTRE LOS PRIMEROS TRES QUE MENCIONE]</p>      | <p>Se le da amor=01<br/> Se le da defensas contra enfermedades=02      _ _ _ <br/> Es barato y práctico=03<br/> Disponible en todos lados=04      _ _ _ <br/> Es la primera vacuna=05<br/> Para que estén sanos=06      _ _ _ <br/> Para que crezca=07<br/> Da nutrientes=08<br/> Para prevenir enfermedades crónicas en el futuro=09<br/> Es normal/ es costumbre=10<br/> Otro=88 (especificar) _____<br/> No sabe=99</p>                                                 |
| <p>7.25 Si dio más de una respuesta: ¿Cuál sería el más importante de los beneficios para su bebé?</p> <p><i>[Si sólo menciona una repita el código]</i></p>                                                                                                              | <p> _ _ _ </p>                                                                                                                                                                                                                                                                                                                                                                                                                                                             |
| <p>7.26 ¿Cuáles cree Usted que son los <b>beneficios/ventajas</b> para la <b>madre</b> de dar <u>sólo</u> pecho (sin agua, ni ningún líquido, ni otra leche, ni probaditas de alimentos) al bebé por <b>6 meses</b>?</p> <p>[REGISTRE LOS PRIMEROS TRES QUE MENCIONE]</p> | <p>Es gratis (economía)=01<br/> Es práctico (disponible en todos lados)=02      _ _ _ <br/> La madre baja de peso=03<br/> Ayuda a no quedar embarazada (anticonceptivo)=04      _ _ _ <br/> Disminuye el sangrado posparto=05<br/> Disminuye depresión post parto=06      _ _ _ <br/> Disminuye cáncer de mama=07<br/> Disminuye cáncer de útero=08<br/> Ninguna/ es normal/ es costumbre=09<br/> Otro=88 (especificar) _____<br/> No sabe=99</p>                          |
| <p>7.27 Si dio más de una respuesta ¿Cuál sería el más importante de los beneficios para la madre?</p> <p><i>[Si sólo menciona una repita el código]</i></p>                                                                                                              | <p> _ _ _ </p>                                                                                                                                                                                                                                                                                                                                                                                                                                                             |
| <p>7.28 ¿Qué cree que necesitaría Usted para dar (o haber dado) <u>sólo</u> pecho (sin agua, ningún líquido, ni otra leche, ni probaditas de alimentos) por los primeros <b>6 meses</b>?</p> <p>[REGISTRE LOS PRIMEROS TRES QUE MENCIONE]</p>                             | <p>Tiempo=01<br/> Que alguien le ayudara a cuidar a sus otros hijos =02      _ _ _ <br/> Que alguien la ayudara en los quehaceres del hogar=03<br/> Que alguien le diga cómo hacerlo=04      _ _ _ <br/> Una buena alimentación (que incluya frutas y verduras)=05      _ _ _ <br/> Tomar más agua=06<br/> Que alguien le explique cómo sacarse la leche=07<br/> Nada=08<br/> Que el bebé agarre o acepte el pecho=09<br/> Otro=88 (especificar) _____<br/> No sabe=99</p> |
| <p>7.29 Si dio más de una respuesta, ¿Cuál opinión sería la más importante para dar sólo pecho a su bebé por 6 meses?</p> <p><i>[Si sólo menciona una repita el código]</i></p>                                                                                           | <p> _ _ _ </p>                                                                                                                                                                                                                                                                                                                                                                                                                                                             |

|                                                                                                                                                                                                                                                                                                                                                                                                                                                                                              |                                                                                                                                                                                                                                                                                                                                                                                                                                                                                                                                                                            |
|----------------------------------------------------------------------------------------------------------------------------------------------------------------------------------------------------------------------------------------------------------------------------------------------------------------------------------------------------------------------------------------------------------------------------------------------------------------------------------------------|----------------------------------------------------------------------------------------------------------------------------------------------------------------------------------------------------------------------------------------------------------------------------------------------------------------------------------------------------------------------------------------------------------------------------------------------------------------------------------------------------------------------------------------------------------------------------|
| <p>7.30 <b>Leer:</b> Algunas mujeres tienen problemas para alimentar a sus bebés con <u>sólo</u> leche materna (sin agua, ni ningún líquido, ni otra leche, ni probaditas de alimentos).</p> <p>En su opinión, ¿cuáles considera Usted que son las principales dificultades para dar <u>sólo</u> pecho (sin agua ni ningún líquido, ni otra leche, ni probaditas de alimentos) a los bebés durante sus <b>6 primeros meses de vida</b>?</p> <p>[REGISTRE LOS PRIMEROS TRES QUE MENCIONE]</p> | <p>Nada o ninguno =01<br/> Que el bebé se queda con hambre, la leche no lo llena=02<br/> No tiene suficiente leche=03<br/> Leche no lo alimenta (no nutritiva)=04                    __ __ <br/> Les duelen los pechos=05<br/> La falta de tiempo=06<br/> La falta de experiencia o practica=07                    __ __ <br/> No quiere o decide no dar desde el inicio=08<br/> Tienen que ir a trabajar=09<br/> Teme se maltraten o deformen los senos=10            __ __ <br/> No tienen bien formado el pezón=11<br/> Otro=88 (especificar) _____<br/> No sabe=99</p> |
| <p>7.31 Si dio más de una respuesta ¿Cuál opinión sería la más importante para dar <u>sólo</u> pecho por <b>6 meses</b>?</p> <p>[Si sólo menciona <b>una</b> repita el código]</p>                                                                                                                                                                                                                                                                                                           | <p> __ __ </p>                                                                                                                                                                                                                                                                                                                                                                                                                                                                                                                                                             |
| <p>7.32 <b>Leer:</b> A algunas mujeres se les va la leche o corta la leche cuando están dando pecho.</p> <p>En su opinión, ¿cuáles serían las principales causas o razones por las que se va la leche?</p> <p>[REGISTRE LOS PRIMEROS TRES QUE MENCIONE]</p>                                                                                                                                                                                                                                  | <p>Toman anticonceptivos=1<br/> Un susto o coraje=2                                            __ <br/> El bebé come demasiado y se acaba=3<br/> No está bien nutrida=4                                        __ <br/> No toma suficiente atole o líquidos=5<br/> Otro (esp) =8 _____                                    __ <br/> No sabe=9</p>                                                                                                                                                                                                                           |
| <p>7.33 Si dio más de una respuesta ¿cuál opinión sería la más importante del porque a algunas mujeres se les va la leche?</p> <p>[Si sólo menciona <b>una</b> repita el código]</p>                                                                                                                                                                                                                                                                                                         | <p> __ </p>                                                                                                                                                                                                                                                                                                                                                                                                                                                                                                                                                                |
| <p>7.34 <b>Leer:</b> Algunas mujeres prefieren no alimentar a sus bebés con <u>sólo</u> leche materna.</p> <p>En su opinión, ¿cómo son (en actitud o forma de ser) las mujeres que no quieren dar <u>sólo</u> pecho a su bebé en los primeros 6 meses de vida?</p> <p>[REGISTRE LOS PRIMEROS TRES QUE MENCIONE]</p>                                                                                                                                                                          | <p>Son muy jóvenes=1<br/> Son primerizas=2                                            __ <br/> Son flojas=3<br/> Trabajan=4                                                        __ <br/> Descuidadas con los hijos=5<br/> Son buenas madres =6                                        __ <br/> Se preocupan por sus hijos=7<br/> Otro (esp)=8 _____<br/> No sabe=9</p>                                                                                                                                                                                                  |
| <p>7.35 Si dio más de una respuesta ¿cuál opinión sería la más importante de cómo son las mujeres que no dan <u>sólo</u> pecho por 6 meses?</p> <p>[Si sólo menciona <b>una</b> repita el código]</p>                                                                                                                                                                                                                                                                                        | <p> __ __ </p>                                                                                                                                                                                                                                                                                                                                                                                                                                                                                                                                                             |
| <p>7.36 ¿Qué cree Usted que pueda motivar o hacerles cambiar de opinión a las mujeres para que le den <u>sólo</u> pecho (sin agua, ni ningún líquido, ni otra leche, ni probaditas de alimentos) a su bebé durante los primeros <b>6 meses de vida</b>?</p> <p>[REGISTRE LOS PRIMEROS TRES QUE MENCIONE]</p>                                                                                                                                                                                 | <p>Que el bebé crecerá más sano=01<br/> Que lo pueda hacer bien=02                                __ __ <br/> Que alguien le ayude=03<br/> Que tenga tiempo para hacerlo=04                    __ __ <br/> Que sepan los beneficios=05<br/> No gastar o la economía familiar=06                __ __ <br/> Evita obesidad en el niño=07<br/> Evita desnutrición=08<br/> Se enferma menos=09<br/> Más información (ej. no se deforma el cuerpo)=10<br/> Otro =88 (especificar) _____<br/> No sabe=99</p>                                                                    |

|                                                                                                                                                                                                                                                                                                         |                                                                                                                                                                                                                                                                                                                                                                                                                                                                                                                                                                                                                                                                                                        |
|---------------------------------------------------------------------------------------------------------------------------------------------------------------------------------------------------------------------------------------------------------------------------------------------------------|--------------------------------------------------------------------------------------------------------------------------------------------------------------------------------------------------------------------------------------------------------------------------------------------------------------------------------------------------------------------------------------------------------------------------------------------------------------------------------------------------------------------------------------------------------------------------------------------------------------------------------------------------------------------------------------------------------|
| <p>7.37 Si dio más de una respuesta, ¿cuál sería la motivación más importante para dar <u>sólo</u> pecho (sin agua ni ningún líquido, ni otra leche, ni probaditas de alimentos) por <b>6 meses</b>?</p> <p><i>[Si sólo menciona <b>una</b> repita el código]</i></p>                                   | <p> _ _ _ </p>                                                                                                                                                                                                                                                                                                                                                                                                                                                                                                                                                                                                                                                                                         |
| <p>7.38 ¿Conoce a algún familiar/conocida que haya dado (o esté dando) <u>sólo</u> pecho (sin agua, ni ningún líquido, ni otra leche, ni probaditas de alimentos a sus hijos por los primeros <b>6 meses</b> de vida (exclusiva)?</p>                                                                   | <p>Si=1<br/> No=2 } <b>pase a 7.44</b><br/> No sabe=9 }  _ _ </p>                                                                                                                                                                                                                                                                                                                                                                                                                                                                                                                                                                                                                                      |
| <p>7.39 ¿Por qué cree que su familiar/conocida le dio (o le da) <u>sólo</u> pecho (sin agua, ni ningún líquido, ni otra leche, ni probaditas de alimentos a sus hijos(as)) por los primeros <b>6 meses</b>?</p> <p>[REGISTRE LOS PRIMEROS TRES QUE MENCIONE]</p>                                        | <p>en el hospital o clínica la orientaron=01<br/> porque se lo recomendó el médico=02  _ _ _ <br/> porque se lo recomendó su mamá=03<br/> porque se lo recomendó su suegra=04  _ _ _ <br/> porque era lo mejor para el niño(a)=05<br/> porque tenía experiencia con sus otros hijos(a)=06  _ _ _ <br/> porque no tiene para comprar otras leches=07<br/> porque es buena madre =08<br/> porque es floja y no quiere preparar otros alimentos =09<br/> le dieron tiempo en el trabajo =10<br/> porque el niño(a) acepto o agarro bien el pecho=11<br/> porque está joven y sana=12<br/> porque tiene bastante leche=13<br/> tiene pareja/esposo=14<br/> Otro=88 (especificar) _____<br/> No sabe=99</p> |
| <p>7.40 .Si dio más de una respuesta, ¿cuál sería la razón más importante por la que su familiar/conocida diera <u>sólo</u> pecho (sin agua ni ningún líquido, ni otra leche, ni probaditas de alimentos) por 6 meses a su hijo(a)?</p> <p><i>[Si sólo menciona <b>una</b> repita el código]</i></p>    | <p> _ _ _ </p>                                                                                                                                                                                                                                                                                                                                                                                                                                                                                                                                                                                                                                                                                         |
| <p>7.41 ¿Qué <b>opina</b> sobre que su familiar/ conocida dio (o le da) <u>sólo</u> pecho (sin agua ni ningún líquido, ni otra leche, ni probaditas de alimentos) a sus hijos por los primeros <b>6 meses</b> de vida?</p>                                                                              | <p>Que está bien=1<br/> Que no está bien=2  _ _ <br/> No sabe=9</p>                                                                                                                                                                                                                                                                                                                                                                                                                                                                                                                                                                                                                                    |
| <p>7.42 ¿Por qué tiene esa opinión sobre que su familiar/ conocida diera (o da) <u>sólo</u> pecho (sin agua ni ningún líquido, ni otra leche, ni probaditas de alimentos) por <b>6 meses</b> a su(s) hijo(a)(s)?</p> <p>[REGISTRE LOS PRIMEROS TRES QUE MENCIONE]</p>                                   | <p>Porque es bueno, protege y nutre al bebé=01<br/> Porque es buena madre=02  _ _ _ <br/> Que lo dejó muy desprotegido (de salud)=03<br/> Que tenía mucha experiencia=04  _ _ _ <br/> Que tenía tiempo=05<br/> Que lo hizo por falta de dinero=06  _ _ _ <br/> Que hizo mal porque necesita otros alimentos=07<br/> La leche materna sola no lo alimenta=08<br/> Que hay que darle agua=09<br/> Que hay que darle té =10<br/> Que lo mal acostumbra=11<br/> Que no es bueno para la madre, la debilita=12<br/> Médico no lo recomienda=13<br/> Otro=88 (especificar) _____<br/> No sabe=99</p>                                                                                                         |
| <p>7.43 Si dio más de una respuesta ¿cuál sería la opinión más importante del porque su familiar/ conocida dio (o da) <u>sólo</u> pecho (sin agua ni ningún líquido, ni otra leche, ni probaditas de alimentos) por 6 meses a su bebé?</p> <p><i>[Si sólo menciona <b>una</b> repita el código]</i></p> | <p> _ _ _ </p>                                                                                                                                                                                                                                                                                                                                                                                                                                                                                                                                                                                                                                                                                         |

|                                                                                                                                                                                                                                                                                                                           |                                                                                                                                                                                                                                                                                                                                                                                                                                                                                     |
|---------------------------------------------------------------------------------------------------------------------------------------------------------------------------------------------------------------------------------------------------------------------------------------------------------------------------|-------------------------------------------------------------------------------------------------------------------------------------------------------------------------------------------------------------------------------------------------------------------------------------------------------------------------------------------------------------------------------------------------------------------------------------------------------------------------------------|
| <p>7.44 Cuando tiene alguna duda sobre cómo alimentar con <b>sólo</b> pecho a su bebé (sin agua ni ningún líquido, ni otra leche, ni probaditas de alimentos), ¿En dónde busca o pregunta por información?</p> <p><b>[Utilice código 1=Si; 2=No; 9=No sabe]</b></p> <p><i>[Todas las casillas deberán tener dato]</i></p> | <p>01. Libros o revistas.....  __ </p> <p>02. Médico.....  __ </p> <p>03. Enfermera .....  __ </p> <p>04. Promotor de salud.....  __ </p> <p>05. Vocal de Oportunidades.....  __ </p> <p>06. Amigos o familiares.....  __ </p> <p>07. Madre.....  __ </p> <p>08. Suegra.....  __ </p> <p>09. Pareja/esposo.....  __ </p> <p>10. Televisión / radio.....  __ </p> <p>11. Internet.....  __ </p> <p>12. Especialista (pediatra).....  __ </p> <p>88. Otro (especificar).....  __ </p> |
| <p>7.45 De estas opciones que mencionó, ¿Cuál es la más importante para Usted?</p> <p><i>[Si sólo menciona <b>una</b> repita el código]</i></p>                                                                                                                                                                           | <p> __ </p>                                                                                                                                                                                                                                                                                                                                                                                                                                                                         |
| <p>7.46 Del 0 al 10, ¿Me puede decir que tan confiada o segura está Usted de que la leche materna está alimentando o alimentó bien a su bebé (o NOMBRE) en los primeros <b>6 meses</b>?</p> <p><b>[MUESTRE TARJETA CON ESCALA DE RESPUESTA]</b></p>                                                                       | <p>No sabe=99  __ __ </p>                                                                                                                                                                                                                                                                                                                                                                                                                                                           |
| <p>7.47 Del 0 al 10, ¿Me puede decir que tan confiada o segura está en que la leche materna es mejor que darle leche comercial o fórmula láctea a su bebé en los primeros <b>6 meses</b> de vida?</p> <p><b>[MUESTRE TARJETA CON ESCALA DE RESPUESTA]</b></p>                                                             | <p>No sabe=99  __ __ </p>                                                                                                                                                                                                                                                                                                                                                                                                                                                           |
| <p>7.48 Del 0 al 10, ¿Me puede decir que tan confiada o segura está en que la leche comercial o fórmula láctea es mejor que darle leche materna a su bebé en los primeros <b>6 meses</b> de vida?</p> <p><b>[MUESTRE TARJETA CON ESCALA DE RESPUESTA]</b></p>                                                             | <p>No sabe=99  __ __ </p>                                                                                                                                                                                                                                                                                                                                                                                                                                                           |
| <p><b>[APLIQUE SI REPORTÓ ≥5 EN LA PREGUNTA ANTERIOR]</b></p> <p>7.49 ¿En qué marca de leche pensó para responder a la pregunta anterior?</p>                                                                                                                                                                             | <p>R=_____  __ </p> <p>[El código se asignará en captura]</p>                                                                                                                                                                                                                                                                                                                                                                                                                       |
| <p>7.50 Del 0 al 10, ¿Me puede decir que tan confiada o segura está en qué la leche materna alimenta a su bebé después del año?</p> <p><b>[MUESTRE TARJETA CON ESCALA DE RESPUESTA]</b></p>                                                                                                                               | <p>No sabe=99  __ __ </p>                                                                                                                                                                                                                                                                                                                                                                                                                                                           |
| <p>7.51 ¿Ud. cree que hay alguna ventaja para darle leche de formula al bebe durante los primeros <b>6 meses</b> de vida?</p>                                                                                                                                                                                             | <p>Si=1  __ </p> <p>No=2</p> <p>No sabe/ no contesta=9 } <b>Pase a 7.53</b></p>                                                                                                                                                                                                                                                                                                                                                                                                     |
| <p>7.52 ¿Cuáles ventajas considera que tiene darle leche de fórmula al bebé durante los primeros <b>6 meses</b> de vida?</p> <p><b>[REGISTRE HASTA TRES OPCIONES]</b></p>                                                                                                                                                 | <p>Si no tiene tiempo, porque trabaja.....,1  __ </p> <p>Porque es bueno para el bebé.....2  __ </p> <p>Porque alimenta al bebe.....3  __ </p> <p>Porque se complementa con el pecho.....4  __ </p> <p>Porque llena .....5  __ </p> <p>Es fácil de preparar.....6</p> <p>Otro (especificar).....8</p> <p>No sabe.....9</p>                                                                                                                                                          |
| <p>7.53 Usted sabe o le han dicho ¿Cuánto tiempo en total hay que dar pecho a su niño(a) combinándola con (o además de) otros alimentos?</p>                                                                                                                                                                              | <p>Si=1 ¿Cuánto tiempo en total? =  __ __  meses  __ </p> <p>No=2</p> <p>No sabe/ no contesta=9</p> <p><b>[Utilice código 99 si no especifica tiempo en total]</b></p>                                                                                                                                                                                                                                                                                                              |

| 8. Sección de atención al parto (APLIQUE A MUJERES QUE REFIEREN TENER UN HIJO MENOR DE 1 AÑO (SI ES UNA MUJER EMBARAZADA PRIMERIZA PASE A LA SECCIÓN 11)<br>ANOTE NOMBRE DEL <1 AÑO BENEFICIARIO DE OPORTUNIDADES=_____ |                                                                                                                                                                                                                                                                                                                  |
|-------------------------------------------------------------------------------------------------------------------------------------------------------------------------------------------------------------------------|------------------------------------------------------------------------------------------------------------------------------------------------------------------------------------------------------------------------------------------------------------------------------------------------------------------|
| Ahora me gustaría hablar con Usted sobre la atención al parto que tuvo con [NOMBRE]                                                                                                                                     |                                                                                                                                                                                                                                                                                                                  |
| 8.1 ¿En dónde se atendió el parto de (NOMBRE)?<br><br>[No lea, ni sugiera, registre la que indique la encuestada]                                                                                                       | Centro de Salud de SSA.....1<br>Clínica u Hospital del IMSS Oportunidades...2  __ <br>Hospital de la SSA.....3<br>Partera.....4<br>Consultorio o clínica privada.....5<br>Otro =8 (especifique) _____<br>No sabe.....9                                                                                           |
| 8.2 ¿Cómo fue el parto de (NOMBRE)?                                                                                                                                                                                     | Cesárea=1<br>Normal o natural=2  __ <br>Otro=8 (especifique) _____<br>No sabe=9                                                                                                                                                                                                                                  |
| 8.3 ¿A los cuántos meses nació [NOMBRE]?                                                                                                                                                                                | A término=1<br>Prematuro=2  __ <br>Meses=3 (especifique).....  __ __ <br>Semanas=4(especifique).....  __ __ <br>No sabe=9                                                                                                                                                                                        |
| 8.4 Cuando nació (NOMBRE), ¿En qué momento se lo entregaron?                                                                                                                                                            | Al momento=1<br>Antes de media hora ó 30 min. =2  __ <br>Horas después=3 (especifique).....  __ __ <br>El mismo día, no sabe horas=4<br>Al otro día=5<br>Al tercer día=6<br>Otro =8 (especifique) _____<br>No sabe/no recuerda=9                                                                                 |
| 8.5 Cuando nació [NOMBRE], ¿En dónde se quedó o estaba su hijo, mientras estuvieron en el hospital o clínica para la atención del parto?                                                                                | Se quedó en la misma habitación con ella=1<br>Se quedó en el cunero=2  __ <br>Requirió incubadora=3<br>Otro=8 (especifique) _____<br>No sabe=9                                                                                                                                                                   |
| 8.6 ¿Qué opina sobre el alojamiento conjunto (que el bebé y la madre estén la misma habitación)?                                                                                                                        | Que está bien=1<br>No está bien=2  __ <br>No sabe, no responde=9                                                                                                                                                                                                                                                 |
| 8.7 ¿Por qué razón opina eso sobre el alojamiento conjunto (que el niño(a) se quedé con la madre en la misma habitación)?                                                                                               | Porque lo puede cuidar mejor=1<br>Se puede alimentar con pecho al bebé=2  __ <br>Para tener contacto con la mamá=3<br>Por seguridad=4<br>Prefiere que lo vigile la enfermera o médico=5<br>Lo hacen porque las enfermeras tienen mucho trabajo=6<br>Es más inseguro=7<br>Otro=8 (especifique) _____<br>No sabe=9 |
| 8.8 ¿Usted le dio pecho a (NOMBRE), mientras estuvo en el hospital o clínica para la atención al parto?                                                                                                                 | Si=1  __ <br>No=2 →Pase a 8.15                                                                                                                                                                                                                                                                                   |
| 8.9 ¿Al cuánto tiempo de nacido(a) [NOMBRE] le dio pecho por primera vez?                                                                                                                                               | Al momento=1  __ <br>Antes de la media hora ó 30 min.=2<br>Cuándo se lo entregaron=3 (especifique núm. horas)  __ __ <br>El mismo día, no sabe horas=4<br>Al otro día=5<br>Al tercer día=6<br>Otro =8 (especifique) _____<br>No sabe/no recuerda=9                                                               |

|                                                                                                                                                                                        |                                                                                                                                                                                                                                                                                                                                                                                                |
|----------------------------------------------------------------------------------------------------------------------------------------------------------------------------------------|------------------------------------------------------------------------------------------------------------------------------------------------------------------------------------------------------------------------------------------------------------------------------------------------------------------------------------------------------------------------------------------------|
| 8.10 ¿Tuvo algún problema para dar pecho a (NOMBRE) mientras estuvo en el hospital o en los primeros días de nacido?                                                                   | Si=1<br>No=2<br>No sabe=9 } <b>Pase a 8.15</b>  __                                                                                                                                                                                                                                                                                                                                             |
| 8.11 ¿Qué problema tuvo para dar pecho a (NOMBRE) mientras estuvo en el hospital o en los primeros días de nacido?<br><br>[REGISTRE LOS PRIMEROS TRES QUE MENCIONE]                    | Dolor o pezones irritados o lastimados =01<br>Grietas en pezones=02  __ __ <br>Leche no baja =03<br>No tuvo suficiente leche=04  __ __ <br>Leche aguada o considerada de baja calidad=05<br>Pechos congestionados=06  __ __ <br>Bebé no quería comer o agarrar el pecho=07<br>Bebé no sabía agarrar el pecho=08<br>La madre no quiso dar pecho=09<br>Otro=88 (especificar) _____<br>No sabe=99 |
| 8.12 De los problemas que me acaba de mencionar, ¿Cuál considera el más importante?<br><br>[Si sólo menciona <b>una</b> repita el código]                                              | __ __                                                                                                                                                                                                                                                                                                                                                                                          |
| 8.13 ¿Le ayudó alguien a resolverlos?                                                                                                                                                  | Si=1<br>No=2<br>No sabe/no recuerda=9 } <b>Pase a 8.15</b>  __                                                                                                                                                                                                                                                                                                                                 |
| 8.14 ¿Quién le ayudó a resolver sus problemas cuando daba pecho a [NOMBRE]?                                                                                                            | Médico=1<br>Enfermera o personal de salud=2  __ <br>Madre =3<br>Suegra=4<br>Amiga, conocida=5<br>Vocal de Oportunidades=6<br>Otro=8 (especifique) _____<br>No sabe=9                                                                                                                                                                                                                           |
| 8.15 Durante su estancia en la clínica u hospital donde nació (NOMBRE) ¿Usted o alguien más <b>le dieron otros líquidos o leche</b> diferente a la leche materna a su bebé?            | Si=1<br>No=2<br>No sabe=9 } <b>Pase siguiente Sección</b>  __                                                                                                                                                                                                                                                                                                                                  |
| 8.16 ¿Qué le dio o le dieron (tés, líquidos u otra leche) a su bebé mientras estuvo en el hospital o clínica?<br><br>[No lea ni sugiera las respuestas. ANOTE LAS DOS MÁS IMPORTANTES] | Solución glucosada=01<br>Leche de fórmula=02  __ __ <br>Leche Nido=03<br>Leche Liconsa=04  __ __ <br>Leche Nutricrece=05<br>Otra leche=06 (especificar) _____<br>Agua natural=07<br>Té=08<br>Jugo de frutas o industrializado=09<br>Otro=88 (especificar) _____<br>No sabe=99                                                                                                                  |
| 8.17 ¿En qué utensilio se lo dió o se lo dieron?                                                                                                                                       | Mamila=1<br>Cuchara=2  __ <br>Taza=3<br>Gotero/jeringa/sonda=4<br>Otro=8 (especificar) _____<br>No sabe=9                                                                                                                                                                                                                                                                                      |



|                                                                                                                                                                                                                             |                                                                                                                                                                                                                                                                                                                                                                                                                                                                                      |
|-----------------------------------------------------------------------------------------------------------------------------------------------------------------------------------------------------------------------------|--------------------------------------------------------------------------------------------------------------------------------------------------------------------------------------------------------------------------------------------------------------------------------------------------------------------------------------------------------------------------------------------------------------------------------------------------------------------------------------|
| <p>9.9 ¿Por qué cree que se tiene que limpiar el pecho de la madre antes de dar leche a su bebé?</p>                                                                                                                        | <p>Porque si está sucio se puede enfermar=1<br/>         Porque el sabor de la leche materna cambia=2  __ <br/>         Porque el médico lo recomienda=3<br/>         Porque la enfermera lo recomienda=4<br/>         Porque la suegra se lo recomienda=5<br/>         Otro=8 (especificar) _____<br/>         No sabe=9</p>                                                                                                                                                        |
| <p>9.10 ¿Usted qué entiende por empacho del niño(a) o (NOMBRE)?</p> <p><b>[Utilice código 1=Si; 2=No; 9=No sabe]</b></p> <p><i>[Todas las casillas deberán tener dato]</i></p>                                              | <p>01. Dolor del estómago.....  __ <br/>         02. Inflamación del estómago.....  __ <br/>         03. Cólicos.....  __ <br/>         04. Diarrea.....  __ <br/>         05. Estreñimiento.....  __ <br/>         06. Lengua blanca o amarilla.....  __ <br/>         07. Baba blanca .....  __ <br/>         08. Llanto, tristeza e inquietud.....  __ <br/>         09. Gases, reflujo.....  __ <br/>         10. Mucha sed.....  __ <br/>         88. Otro (esp) .....  __ </p> |
| <p>9.11 ¿Usted por qué cree que ocurre el empacho?</p> <p><b>[Utilice código 1=Si; 2=No; 9=No sabe]</b></p> <p><i>[Todas las casillas deberán tener dato]</i></p>                                                           | <p>1. Por un susto.....  __ <br/>         2. Cuando se sobrecarga el estómago.....  __ <br/>         3. Cuando se ha tomado demasiada leche o alimento en particular.....  __ <br/>         4. Cuando se dan alimentos no bien cocidos (o indigeribles) .....  __ <br/>         5. Por ofrecer alimentos fuera del horario (antes o después de dormir) .....  __ <br/>         6. Por dar alimentos secos.....  __ <br/>         8. Otro (esp) .....  __ </p>                        |
| <p>9.12 De sus actividades cotidianas. ¿Qué cree que puede afectar su leche y le pueda hacer daño a su bebé?</p> <p><b>[Utilice código 1=Si; 2=No; 9=No sabe]</b></p> <p><i>[Todas las casillas deberán tener dato]</i></p> | <p>1. Tomar baño y dar pecho.....  __ <br/>         2. Llegar de la calle y darle pecho.....  __ <br/>         3. Tener un susto y dar pecho.....  __ <br/>         4. Cuando el cuerpo está caliente y da pecho.....  __ <br/>         5. Si come alimentos fríos y da pecho.....  __ <br/>         8. Otro (esp) .....  __ </p>                                                                                                                                                    |
| <p><b>Leer: "Señora ahora vamos a hablar sobre lo que (NOMBRE) comió o se alimentó el día de ayer".</b></p>                                                                                                                 |                                                                                                                                                                                                                                                                                                                                                                                                                                                                                      |
| <b>A</b>                                                                                                                                                                                                                    | <b>B</b>                                                                                                                                                                                                                                                                                                                                                                                                                                                                             |
| <p>9.13 Alimentos</p>                                                                                                                                                                                                       | <p>¿En cualquier momento de ayer ó de anoche le dio a (NOMBRE) algunos de los siguientes alimentos?</p>                                                                                                                                                                                                                                                                                                                                                                              |
| <p>a. Agua simple</p>                                                                                                                                                                                                       | <p>Si.....1 No....2  __ <br/>         No sabe/no recuerda... 9</p>                                                                                                                                                                                                                                                                                                                                                                                                                   |
| <p>b. Suero oral,<br/>         c. Gotas, jarabes medicinales (vitaminas, minerales, medicinas)</p>                                                                                                                          | <p>Si.....1 No....2  __ <br/>         Si.....1 No....2  __ <br/>         No sabe/no recuerda... 9</p>                                                                                                                                                                                                                                                                                                                                                                                |
| <p>d. Fórmula infantil<br/>         e. Leche en polvo<br/>         f. Otra leche</p>                                                                                                                                        | <p>Si.....1 No....2  __  ¿Cuál? _____ __ <br/>         Si.....1 No....2  __  ¿Cuál? _____ __ <br/>         Si.....1 No....2  __  ¿Cuál? _____ __ <br/>         No sabe/no recuerda... 9</p> <p><i>[El código de la leche se agregará en captura]</i></p>                                                                                                                                                                                                                             |
| <p>g. Leche LICONSA en polvo<br/>         h. Leche LICONSA líquida</p>                                                                                                                                                      | <p>Si.....1 No....2  __ <br/>         Si.....1 No....2  __ <br/>         No sabe/no recuerda... 9</p>                                                                                                                                                                                                                                                                                                                                                                                |

|                                                                                                                                                                                                                                                                                     |                                                                                                                                                                                                                                                                                           |
|-------------------------------------------------------------------------------------------------------------------------------------------------------------------------------------------------------------------------------------------------------------------------------------|-------------------------------------------------------------------------------------------------------------------------------------------------------------------------------------------------------------------------------------------------------------------------------------------|
| <b>9.14 Líquidos no nutritivos</b><br>a. Agua endulzada<br>b. Té (simple ó endulzado)<br>c. Café con agua (simple ó endulzado)<br>d. Refresco<br>e. Caldo de frijol (sólo el caldo)<br>f. Caldo de pollo ó res (sólo el caldo)<br>g. Aguamiel (sin fermentar)<br>h. Jugos de frutas | Si.....1    No....2     __ <br>Si.....1    No....2     __ <br>No sabe/no recuerda... 9          |
| <b>9.15 Líquidos nutritivos</b><br>a. Atole con agua<br>b. Atole con leche<br>c. Otro cereal (como avena, tapioca, etc.) (Con agua o con leche)                                                                                                                                     | Si.....1    No....2     __ <br>Si.....1    No....2     __ <br>Si.....1    No....2     __ <br>No sabe/no recuerda... 9                                                                                                                                                                     |
| <b>A</b>                                                                                                                                                                                                                                                                            | <b>B</b>                                                                                                                                                                                                                                                                                  |
| Alimentos                                                                                                                                                                                                                                                                           | ¿En cualquier momento de ayer ó de anoche le dio a (NOMBRE) algunos de los siguientes alimentos?                                                                                                                                                                                          |
| <b>9.16 Cereales y leguminosas</b><br>a. Sopa de pasta<br>b. Arroz<br>c. Tortillas<br>d. Cereales industrializados para bebés en caja<br>e. Pan (cualquiera)<br>f. Avena<br>g. Lentejas<br>h. Habas                                                                                 | Si.....1    No....2     __ <br>Si.....1    No....2     __ <br>No sabe/no recuerda... 9          |
| i. Frutas<br><br>j. Verduras<br>(Incluye envasados ó en frasco. NO DIGA MARCAS)                                                                                                                                                                                                     | Si.....1    No....2     __  ¿Cuáles? _____  __ <br>_____  __ <br>_____  __ <br>Si.....1    No....2     __  ¿Cuáles? _____  __ <br>_____  __ <br>_____  __ <br>No sabe/no recuerda... 9<br><br>[Cuáles frutas y verduras, registre las tres principales, el código se asignará en captura] |
| k. Carne de res, cerdo.<br>l. Corazón, hígado, menudencias (riñón, mollejas, etc.)<br>(Incluye envasados ó en frasco. NO DIGA MARCAS)                                                                                                                                               | Si.....1    No....2     __ <br>Si.....1    No....2     __ <br>No sabe/no recuerda... 9                                                                                                                                                                                                    |
| m. Carne de pollo<br>n. Pescado (fresco ó en lata)<br>o. Pancita<br>(Incluye envasados ó en frasco. NO DIGA MARCAS)                                                                                                                                                                 | Si.....1    No....2     __ <br>Si.....1    No....2     __ <br>Si.....1    No....2     __ <br>No sabe/no recuerda... 9                                                                                                                                                                     |
| p. Jamón ó salchichas.<br>q. Otros embutidos<br>(Incluye envasados ó en frasco. NO DIGA MARCAS)                                                                                                                                                                                     | Si.....1    No....2     __ <br>Si.....1    No....2     __ <br>No sabe/no recuerda... 9                                                                                                                                                                                                    |
| r. Huevo                                                                                                                                                                                                                                                                            | Si.....1    No....2     __ <br>No sabe/no recuerda... 9                                                                                                                                                                                                                                   |



|                                                                                                                                                                                                         |                                                                                                                                                                                                                                                                                                                                                                                                                                                   |
|---------------------------------------------------------------------------------------------------------------------------------------------------------------------------------------------------------|---------------------------------------------------------------------------------------------------------------------------------------------------------------------------------------------------------------------------------------------------------------------------------------------------------------------------------------------------------------------------------------------------------------------------------------------------|
| 10.6 ¿A partir de qué edad le aconsejaron dar a su hijo(a) otra leche en el centro de salud?                                                                                                            | __ __  meses<br>99= No sabe, no recuerda                                                                                                                                                                                                                                                                                                                                                                                                          |
| 10.7 ¿Cuál fue la principal razón por la que le recomendaron (o recomiendan) dar a su hijo(a) además de la leche materna alguna otra leche o alimento?<br><br>[REGISTRE LOS PRIMEROS TRES QUE MENCIONE] | Cesárea =01<br>Toma de medicamentos de la madre=02  __ __ <br>Enfermedad de la madre (ej. Varicela)=03<br>Reflujo del niño=04<br>Intolerancia a la lactosa=05  __ __ <br>Diarrea=06<br>No tenía suficiente leche o no nutritiva=07<br>El niño queda con hambre, mi leche no lo llenaba=08<br>Complicaciones post-operatorias=09  __ __ <br>Tabaquismo=10<br>Niño(a) prematuro=11<br>Estreñimiento=12<br>Otro (especificar)=88 _____<br>No sabe=99 |
| 10.8 ¿Qué tipo de leche o fórmula le recomendaron en el Centro de Salud?                                                                                                                                | Liconsa=1<br>Nido=2  __ <br>Nan, Enfamil, Enfagrow, Nursoy, etc. =3<br>Leche Lala, Alpura, etc.=4<br>Otro=8 (esp) _____<br>No sabe/ no recuerda=9                                                                                                                                                                                                                                                                                                 |
| 10.9 ¿Usted siguió o sigue la recomendación que le dieron en el Centro de Salud sobre darle otra leche diferente a la materna?                                                                          | Si=1 → <b>Pase a 10.11</b><br>No=2  __ <br>No sabe/no contesta=9                                                                                                                                                                                                                                                                                                                                                                                  |
| 10.10 ¿Por qué no sigue o no siguió la recomendación sobre darle otra leche?                                                                                                                            | Porque es mejor darle pecho.....1<br>Porque no tiene dinero.....2  __ <br>Porque quiere darle amor a su hijo(a).....3<br>Porque su madre le dijo lo contrario.....4<br>Porque no cree en médico.....5<br>Otro=8 (especificar) _____<br>No sabe.....9                                                                                                                                                                                              |
| 10.11 En el Centro de Salud donde lleva a su niño a control o revisión ¿Le recomendaron o (le recomiendan) dar a su hijo(a) probaditas de otros alimentos además de la leche materna?                   | Si=1<br>No=2 } <b>Pase a 10.16</b>  __ <br>No sabe/no contesta=9 }                                                                                                                                                                                                                                                                                                                                                                                |
| 10.12 A partir de qué edad, en el Centro de Salud, le aconsejaron (o aconsejan) dar a su hijo(a) probaditas de otros alimentos además de la leche materna?                                              | __ __  meses<br>99= No sabe, no recuerda                                                                                                                                                                                                                                                                                                                                                                                                          |
| 10.13 ¿Qué tipo de alimentos (aunque sea probaditas) le recomendaron dar a su hijo(a) además de la leche materna en el Centro de Salud?                                                                 | Tortilla, pan, papa, arroz, etc.=1<br>Frutas=2  __ <br>Verduras=3<br>Huevo, carne, hígado, pollo=4<br>Queso, yogurt, etc.=5<br>Frijol, haba, alubia, etc.=6<br>Gerber o alimentos industrializados=7<br>Otro (esp) _____ =8<br>No sabe=9                                                                                                                                                                                                          |
| 10.14 ¿Ud. siguió la recomendación que le dieron en el Centro de Salud sobre darle probaditas de otros alimentos a su hijo(a)?                                                                          | Si=1 → <b>Pase a 10.16</b><br>No=2  __ <br>No sabe/no recuerda=9                                                                                                                                                                                                                                                                                                                                                                                  |

|                                                                                                                                                              |                                                                                                                                                                                                                                                                                                                                                                                                                                        |
|--------------------------------------------------------------------------------------------------------------------------------------------------------------|----------------------------------------------------------------------------------------------------------------------------------------------------------------------------------------------------------------------------------------------------------------------------------------------------------------------------------------------------------------------------------------------------------------------------------------|
| <p>10.15 ¿Por qué no sigue o no siguió la recomendación de que le dieron en el Centro de Salud?</p>                                                          | <p>Porque es mejor darle pecho hasta los 6 meses...1<br/>         Porque no tiene dinero.....2  __ <br/>         Porque quiere darle amor a su hijo(a).....3<br/>         Porque su madre le dijo lo contrario.....4<br/>         Porque no cree en el médico.....5<br/>         Porque es muy pequeño para darle alimentos.....6<br/>         Otro=8 (especificar) _____<br/>         No sabe.....9</p>                               |
| <p>10.16 Alguien de sus familiares, amigas o conocidas, ¿le aconsejó (o aconseja) dar a su hijo(a) además de la leche materna alguna otra leche?</p>         | <p>Si=1<br/>         No=2 } <b>Pase a 10.23</b>  __ <br/>         No sabe/ no contesta=9 }</p>                                                                                                                                                                                                                                                                                                                                         |
| <p>10.17 ¿Quién principalmente le aconsejó (o aconseja) dar a su hijo(a) además de la leche materna alguna otra leche?</p>                                   | <p>Madre=1<br/>         Suegra=2  __ __ <br/>         Hermana(o)=3<br/>         Esposo/pareja=4<br/>         Amiga(o)=5<br/>         Abuela(o)=6<br/>         Otro=8 (especificar) _____<br/>         No sabe=9</p>                                                                                                                                                                                                                    |
| <p>10.18 ¿A partir de qué edad sus familiares/amigos le aconsejaron dar a su hijo(a) dar otra leche a su hijo?</p>                                           | <p> __ __  meses<br/>         99= No sabe, no recuerda</p>                                                                                                                                                                                                                                                                                                                                                                             |
| <p>10.19 ¿Qué tipo de leche le aconsejaron sus familiares/amigos?<br/><br/>[No lea, ni sugiera las respuestas. Anote la más importante]</p>                  | <p>Fórmula ¿Cuál marca?.....1<br/>         Nido.....2  __ <br/>         Leche Liconsa.....3<br/>         Nutri-crece.....4<br/>         Mi leche nutrisano.....5<br/>         Otra(especifique).....8<br/>         No sabe/no recuerda.....9</p>                                                                                                                                                                                       |
| <p>10.20 ¿Cuál fue la principal razón o motivo por la que su familiar, amigos o conocidos le aconsejaron darle otra leche al bebé aparte del pecho?</p>      | <p>No tenía suficiente leche=1<br/>         Bebé prematuro o bajo de peso=2<br/>         Bebé se quedaba con hambre=3  __ <br/>         Madre delgada o con bajo peso=4<br/>         El bebe no sabía agarrar el pecho=5<br/>         Leche de formula es mejor que la materna=6<br/>         El bebé se enferma(ó) (ej. estreñimiento, cólicos, infección, etc.)=7<br/>         Otro=8 (especificar) _____<br/>         No sabe=9</p> |
| <p>10.21 ¿Ud. siguió la recomendación de familiares/amigos sobre darle otra leche a su hijo(a)?</p>                                                          | <p>Si=1 → <b>Pase a 10.23</b><br/>         No=2  __ <br/>         No sabe/no recuerda=9</p>                                                                                                                                                                                                                                                                                                                                            |
| <p>10.22 ¿Por qué no sigue o no siguió la recomendación de sus familiares/amigos?</p>                                                                        | <p>Porque es mejor darle pecho.....1<br/>         Porque no tiene dinero.....2  __ <br/>         Porque quiere darle amor a su hijo(a).....3<br/>         Porque su madre le dijo lo contrario.....4<br/>         Porque no cree en lo que dicen sus familiares/amigos.....5<br/>         Otro=8 (especificar) _____<br/>         No sabe.....9</p>                                                                                    |
| <p>10.23 Sus familiares/amigos ¿Le recomendaron o (le recomiendan) dar a su hijo(a) además de la leche materna algún alimento o probaditas de alimentos?</p> | <p>Si=1<br/>         No=2 } <b>Pase siguiente Sección</b>  __ <br/>         No sabe/no contesta=9 }</p>                                                                                                                                                                                                                                                                                                                                |
| <p>10.24 A partir de qué edad, sus familiares/amigos, le aconsejaron (o aconseja) dar a su hijo(a) darle otros alimentos además de la leche materna?</p>     | <p> __ __  meses<br/>         99= No sabe, no recuerda</p>                                                                                                                                                                                                                                                                                                                                                                             |

|                                                                                                                   |                                                                                                                                                                                                                                                                                                                                                     |
|-------------------------------------------------------------------------------------------------------------------|-----------------------------------------------------------------------------------------------------------------------------------------------------------------------------------------------------------------------------------------------------------------------------------------------------------------------------------------------------|
| 10.25 ¿Qué tipo de alimentos (aunque sea probaditas) le recomendaron dar a su hijo(a) además de la leche materna? | Tortilla, pan, papa, arroz, etc.=1<br>Frutas=2  ___ <br>Verduras=3<br>Huevo, carne, hígado, pollo=4<br>Queso, yogurt, etc.=5<br>Frijol, haba, alubia, etc.=6<br>Gerber o alimentos industrializados=7<br>Otro (esp) _____ =8<br>No sabe=9                                                                                                           |
| 10.26 ¿Ud. siguió la recomendación de familiares/amigos sobre darle probaditas de otros alimentos a su hijo(a)?   | Si=1 → <b>Pase siguiente Sección</b><br>No=2  ___ <br>No sabe/no recuerda=9                                                                                                                                                                                                                                                                         |
| 10.27 ¿Por qué no sigue o no siguió la recomendación de sus familiares/amigos?                                    | Porque es mejor darle pecho hasta los 6 meses.....1<br>Porque no tiene dinero.....2  ___ <br>Porque quiere darle amor a su hijo(a).....3<br>Porque su madre le dijo lo contrario.....4<br>Porque no cree en sus familiares/amigos.....5<br>Porque cree que es muy pequeño para darle alimentos.....6<br>Otro=8 (especificar) _____<br>No sabe.....9 |

|                                                                                                                                                                                                                                                                        |                                                                                                                                                                                                                                                                                                                                                                                            |
|------------------------------------------------------------------------------------------------------------------------------------------------------------------------------------------------------------------------------------------------------------------------|--------------------------------------------------------------------------------------------------------------------------------------------------------------------------------------------------------------------------------------------------------------------------------------------------------------------------------------------------------------------------------------------|
| <b>11. Sección Alimentación Complementaria (AC) [APLIQUE A TODAS LAS MUJERES] NOMBRE= _____</b>                                                                                                                                                                        |                                                                                                                                                                                                                                                                                                                                                                                            |
| <b>Leer: "Ahora me gustaría comentar con Usted un poco más sobre la alimentación de su hijo(a)".</b>                                                                                                                                                                   |                                                                                                                                                                                                                                                                                                                                                                                            |
| 11.1 ¿A partir de qué edad se pueden dar <b>otros líquidos</b> (tés, leches, agua, etc.) en la alimentación del bebé?                                                                                                                                                  | ___ ___  meses<br>No sabe o no responde= 99                                                                                                                                                                                                                                                                                                                                                |
| 11.2 ¿A partir de qué edad se pueden dar otros <b>alimentos sólidos o suaves</b> (ej. frutas, verduras, etc.) en la alimentación del bebé, además de la leche materna?                                                                                                 | ___ ___  meses<br>No sabe o no responde= 99                                                                                                                                                                                                                                                                                                                                                |
| 11.3 ¿Cuáles alimentos sabe o ha escuchado que son los primeros en dar al niño(a) cuando comienza su alimentación con sólidos (además de la leche materna)?<br><br><b>[Utilice código 1=Si; 2=No; 9=No sabe]</b><br><br><i>[Todas las casillas deberán tener dato]</i> | 01. Pan.....( )<br>02. Arroz.....( )<br>03. Vegetales verdes.....( )<br>04. Frutas.....( )<br>05. Carne.....( )<br>06. Órganos (ej. hígado de pollo) ...( )<br>07. Pescado.....( )<br>08. Huevo.....( )<br>09. Oleaginosas (nueces, almendras, etc.) .....( )<br>10. Otras leches (de bote) .....( )<br>11. Quesos o yogurt.....( )<br>88. Otro (esp) _____.....( )<br>99. No sabe.....( ) |
| 11.4 ¿Cuál cree Usted que es la consistencia o preparación adecuada para ofrecer los alimentos o líquidos al bebé los primeros meses de vida?                                                                                                                          | Molidos (papilla, pure)=1<br>Crudos=2  ___ <br>Cocidos=3<br>Líquidos=4<br>Picados o en trocitos=5<br>Otro =8 (especificar) _____<br>No sabe=9                                                                                                                                                                                                                                              |
| <b>[APLIQUE SI LA ENCUESTADA ES MADRE DE MENOR DE 1 AÑO Y SI REFIERE TENER PAREJA O ESPOSO]</b><br>11.5 ¿Su pareja o esposo participa o se involucra en la alimentación de su hijo(a)?                                                                                 | Si=1<br>No=2 } <b>Pase siguiente Sección</b>  ___ <br>No sabe=9 }                                                                                                                                                                                                                                                                                                                          |
| 11.6 ¿A qué edad su pareja/esposo participó o se involucró más en la alimentación de su hijo(a)?                                                                                                                                                                       | ___ ___  meses<br>No sabe/ no responde/no se involucra= 99                                                                                                                                                                                                                                                                                                                                 |

| <b>12. Sección Lactancia Materna Trabajadora</b><br><b>[ENCUESTADOR: APLIQUE A TODAS LAS MUJERES]</b><br><b>Leer: "Ahora me gustaría platicar sobre la alimentación del bebé cuando las mujeres trabajan o no pueden estar cerca de su bebé".</b> |                                                                                                                                                                                               |    |
|---------------------------------------------------------------------------------------------------------------------------------------------------------------------------------------------------------------------------------------------------|-----------------------------------------------------------------------------------------------------------------------------------------------------------------------------------------------|----|
| 12.1 ¿Usted trabaja o realiza actividades fuera del hogar que la mantienen la mayor parte del día lejos de su bebé?                                                                                                                               | Si=1<br>No=2<br>No sabe=9<br>} <b>Pase a 12.7</b>                                                                                                                                             | __ |
| 12.2 ¿Usted lleva a su hijo(a) con Usted a sus actividades fuera del hogar?                                                                                                                                                                       | Si=1 → <b>Pase a 12.7</b><br>No=2<br>No sabe=9                                                                                                                                                | __ |
| 12.3 ¿Cuántos días de la semana realiza esas actividades fuera del hogar?                                                                                                                                                                         | __  número de días<br>Es variable = 8<br>No sabe = 9                                                                                                                                          |    |
| 12.4 ¿Cuántas horas en promedio por día se encuentra fuera de su hogar cuando realiza esas actividades?                                                                                                                                           | __ __  número de horas<br>Es variable = 88<br>No sabe = 99                                                                                                                                    |    |
| 12.5 Cuando regrese al trabajo o a sus actividades fuera del hogar ¿Usted piensa seguir dando pecho a su bebé?                                                                                                                                    | Si=1<br>No=2<br>No sabe=9<br>} <b>Pase a 12.7</b>                                                                                                                                             | __ |
| 12.6 Cuando regrese al trabajo o a sus actividades fuera del hogar ¿Por cuánto tiempo en total (en meses) planea (o planeó) darle pecho a su bebé?                                                                                                | Total =  __ __  meses<br><br>No sabe o no menciona = 99                                                                                                                                       |    |
| [INDAGAR SOBRE CUALQUIER TIPO DE LACTANCIA MATERNA]                                                                                                                                                                                               |                                                                                                                                                                                               |    |
| 12.7 ¿Usted cree que se pueda hacer algo para seguir dando pecho al bebé cuando una madre regresa a trabajar o está lejos de su hijo(a)?                                                                                                          | Si=1<br>No=2<br>No sabe=9<br>} <b>Pase a 12.9</b>                                                                                                                                             | __ |
| 12.8 ¿Qué cree que se pueda hacer para seguir dando pecho al hijo(a) cuando la madre trabaja o está lejos de su hijo(a)?                                                                                                                          | Darle antes de irse o separarse=1<br>Darle cuando regresa a casa o vuelven a estar juntos=2<br>Extraerse la leche y guardarla=3<br>Todas las anteriores=4<br>Otro =8 (esp) _____<br>No sabe=9 | __ |
| 12.9 ¿Ud. Planea (o planeó) extraerse la leche para dejarla a su hijo(a) para cuando no esté cerca de él/ella?                                                                                                                                    | 1= No planea(ó)<br>2= Estoy pensando (o pensó)<br>3= Está haciéndolo (o lo hizo)<br>4= Va a seguir haciéndolo (o lo hizo)<br>5= Otra respuesta diferente                                      | __ |
| [MUESTRE TARJETA CON OPCIONES DE RESPUESTA]                                                                                                                                                                                                       |                                                                                                                                                                                               |    |
| [APLIQUE SÓLO SI ES MADRE DE MENOR DE 1 AÑO (2 AÑOS) Y SI ESTÁ DANDO PECHO]                                                                                                                                                                       |                                                                                                                                                                                               |    |
| 12.10 ¿Usted se extrae la leche materna para dejarla a su hijo(a)?                                                                                                                                                                                | Si=1<br>No=2<br>No sabe=9                                                                                                                                                                     | __ |
| 12.11 ¿Alguien le ha aconsejado o enseñado sobre técnicas de extracción de leche materna para cuando no se está cerca del bebé?                                                                                                                   | Si=1<br>No=2<br>No sabe=9<br>} <b>Pase a 12.14</b>                                                                                                                                            | __ |
| 12.12 ¿Quién le ha comentado sobre técnicas de extracción de leche materna?                                                                                                                                                                       | Médico=1<br>Enfermera o personal de salud=2<br>Madre=3<br>Suegra=4<br>Amiga, vecina, conocida=5<br>Vocal de Oportunidades=6<br>Abuela=7<br>Otro=8 (especificar) _____<br>No sabe=9            | __ |

|                                                                                                                                                                                                                                                                                       |                                                                                                                                                                                                                                                                                                                       |                                     |
|---------------------------------------------------------------------------------------------------------------------------------------------------------------------------------------------------------------------------------------------------------------------------------------|-----------------------------------------------------------------------------------------------------------------------------------------------------------------------------------------------------------------------------------------------------------------------------------------------------------------------|-------------------------------------|
| 12.13 ¿Cómo le recomendaron extraerse la leche materna?<br>[REGISTRE LAS PRIMERAS DOS OPCIONES DE RESPUESTA]                                                                                                                                                                          | Manual o con bomba de extracción= 01<br>Maquina de extracción=02<br>Otro=88 (especificar) _____<br>No sabe, no responde=99                                                                                                                                                                                            | __ __ <br> __ __                    |
| 12.14 Del 0 al 10, ¿qué tan confiada o segura está de que se pueda extraer la leche materna Usted misma?<br>[MUESTRE TARJETA CON ESCALA DE RESPUESTA]                                                                                                                                 |                                                                                                                                                                                                                                                                                                                       | __ __ <br>No sabe=99                |
| 12.15 Del 0 al 10, ¿qué tan segura o confiada está Usted de que sea útil sacarse la leche materna y ofrecerla al bebé?<br>[MUESTRE TARJETA CON ESCALA DE RESPUESTA]                                                                                                                   |                                                                                                                                                                                                                                                                                                                       | __ __ <br>No sabe=99                |
| <b>[APLIQUE SI EN LA PREGUNTA ANTERIOR SU RESPUESTA FUE MENOR A 5, DE LO CONTRARIO PASE A 12.17]</b><br>12.16 ¿Por qué cree que sea inútil (o no valga la pena) sacarse la leche materna para dejarla al niño(a)?                                                                     | Con la de fórmula es suficiente=1<br>Una vez afuera ya no es nutritiva=2<br>Es muy poca=3<br>Se echa a perder (se contamina)=4<br>La de fórmula es el mismo alimento=5<br>El bebé no nota el cambio (sabor)=6<br>Otro(especificar)=8 _____<br>No sabe=9                                                               | __                                  |
| 12.17 ¿Usted cree que sea complicado extraerse la leche materna?                                                                                                                                                                                                                      | Si =1<br>No=2<br>No sabe=9                                                                                                                                                                                                                                                                                            | } <b>Pase a 12.19</b>  __           |
| 12.18 Del 0 al 10, ¿qué tan fácil cree que sea extraerse la leche materna?<br>[MUESTRE TARJETA CON ESCALA DE RESPUESTA]                                                                                                                                                               |                                                                                                                                                                                                                                                                                                                       | __ __ <br>No sabe=99                |
| 12.19 ¿Ud. sabe por cuánto tiempo se puede <b>almacenar</b> la leche materna <b>fuera del pecho</b> ?                                                                                                                                                                                 | Si =1<br>No=2<br>No sabe=9                                                                                                                                                                                                                                                                                            | } <b>Pase a 12.21</b>  __           |
| 12.20 ¿Cómo almacena y por cuánto tiempo sabe Usted o ha escuchado que se puede almacenar la leche materna <b>fuera del pecho</b> ?<br>[REGISTRE HASTA TRES RESPUESTAS QUE MENCIONE]                                                                                                  | No se puede conservar=1<br>A temperatura ambiente=2<br>¿Cuántas?  __ __  días  __ __  horas<br>En refrigeración=3<br>¿Cuántas?  __ __  días  __ __  horas<br>Congelada=4<br>¿Cuántas?  __ __  días  __ __  horas<br>Otro (especificar)=8 _____<br>No sabe=9                                                           | __ <br> __ <br> __                  |
| <b>[APLIQUE SI LA ENCUESTADA REFIERE TENER PAREJA O ESPOSO, DE LO CONTRARIO PASE A SIGUIENTE SECCIÓN]</b><br>12.21 ¿Usted cree que su <b>esposo/pareja</b> podría apoyarla para que Usted siga (o siguiera) dando leche materna al bebé y continúe con sus actividades fuera de casa? | Si =1<br>No=2<br>No sabe=9                                                                                                                                                                                                                                                                                            | } <b>Pase siguiente Sección</b>  __ |
| 12.22 ¿Cómo cree que su <b>esposo/pareja</b> podría apoyarla para que siga dando leche materna al bebé aunque esté fuera de casa?                                                                                                                                                     | Con el cuidado de los hijos=1<br>Guía y recomendaciones sobre LM=2<br>Masajes, té y alimentos que le ayuden=3<br>Darle espacio y tiempo para hacerlo=4<br>Llevarlo al bebé a ratos para darle pecho=5<br>Darle la leche materna que deje la madre=6<br>Dejar de trabajar=7<br>Otro=8 (especificar) _____<br>No sabe=9 | __                                  |

| <b>13. Sección Diarrea, Sueros de Rehidratación Oral (SRO) y lavado de manos.</b><br><b>[ESTA SECCIÓN APLICA A MADRES]</b><br><b>Leer: "Ahora me gustaría platicar con Usted sobre prácticas de higiene y sobre cambios en la alimentación cuando su hijo(a) se enferma".</b> |                                                                                                                                                                                                                                                                                                                                                                                                                                                                                                                           |
|-------------------------------------------------------------------------------------------------------------------------------------------------------------------------------------------------------------------------------------------------------------------------------|---------------------------------------------------------------------------------------------------------------------------------------------------------------------------------------------------------------------------------------------------------------------------------------------------------------------------------------------------------------------------------------------------------------------------------------------------------------------------------------------------------------------------|
| 13.1 ¿Usted cuenta con drenaje (descarga de aguas negras) en su hogar?                                                                                                                                                                                                        | Si=1<br>No=2 <span style="float:right"> __ </span><br>No sabe=9                                                                                                                                                                                                                                                                                                                                                                                                                                                           |
| 13.2 En su hogar, ¿cuál es la principal fuente o abastecimiento de agua?                                                                                                                                                                                                      | Llave de la red pública de agua potable (dentro de casa)=1<br>Pozo=2 <span style="float:right"> __ </span><br>Cisterna que se llena con pipa=3<br>Depósito comunitario=4<br>Río o laguna=5<br>Otro=8 (especificar) _____<br>No responde=9                                                                                                                                                                                                                                                                                 |
| 13.3 ¿En qué momento se lava Usted las manos cuando está en su casa?<br><br><b>[Utilice código 1=Si; 2=No; 9=No sabe]</b><br><br><i>[Todas las casillas deberán tener dato]</i>                                                                                               | 01. Al momento de preparar los alimentos.....( )<br>02. Antes de ir al baño.....( )<br>03. Después de ir al baño.....( )<br>04. Al momento de alimentar al niño <2años.....( )<br>05. Cuando regresa de la calle.....( )<br>06. Después de cambiar el pañal al niño(a).....( )<br>07. Cuando está en la cocina.....( )<br>08. Antes de consumir alimentos.....( )<br>88. Otro (especificar) _____:( )                                                                                                                     |
| 13.4 ¿Usted con qué se lava las manos?<br><br>[pídale que le muestre con que se lava las manos]                                                                                                                                                                               | Con agua sola=1<br>Con agua y Jabón (cualquiera)=2 <span style="float:right"> __ </span><br>Desinfectante (yodo)=3<br>Vinagre=4<br>Cloro=5<br>Jabón y agua (combinado)=6<br>Alcohol o gel=7<br>Otro=8 (especificar) _____<br>No responde=9                                                                                                                                                                                                                                                                                |
| 13.5 En los últimos tres meses, ¿Tuvo (NOMBRE) diarrea?                                                                                                                                                                                                                       | Si=1<br>No=2 <span style="float:right"> __ </span><br>No sabe=9 <span style="float:right">} Pase a 13.17</span>                                                                                                                                                                                                                                                                                                                                                                                                           |
| 13.6 Para Usted ¿cuándo una diarrea de (NOMBRE) es preocupante?<br><br>[REGISTRE HASTA TRES OPCIONES DE RESPUESTA]                                                                                                                                                            | Cuando hace muchas veces=01<br>Cuando hay sangrado=02 <span style="float:right"> __ __ </span><br>Cuando no toma, ni come nada=03<br>Cuando el niño no deja de llorar=04 <span style="float:right"> __ __ </span><br>Cuando el niño pierde peso=05<br>Cuando el niño tiene los labios secos=06 <span style="float:right"> __ __ </span><br>Cuando el niño tiene los ojos tristes (hundidos)=07<br>Desde el principio (cuando tiene evacuaciones, se queja de dolor, etc.)=08<br>Otro (especificar)=88 _____<br>No sabe=99 |
| 13.7 De las opciones que me acaba de mencionar, para Usted ¿cuál es la más importante?<br>[SI SÓLO MENCIONA UNA REPITA EL CÓDIGO]                                                                                                                                             | __ __                                                                                                                                                                                                                                                                                                                                                                                                                                                                                                                     |
| 13.8 Ud. sabe o le han explicado, ¿Cuál fue la causa del último episodio de diarrea de [nombre]?                                                                                                                                                                              | Si=1<br>No=2 <span style="float:right"> __ </span><br>No sabe=9 <span style="float:right">} Pase a 13.13</span>                                                                                                                                                                                                                                                                                                                                                                                                           |

|                                                                                                                                                                          |                                                                                                                                                                                                                                                                     |
|--------------------------------------------------------------------------------------------------------------------------------------------------------------------------|---------------------------------------------------------------------------------------------------------------------------------------------------------------------------------------------------------------------------------------------------------------------|
| 13.9 ¿Cuál fue la causa del último episodio de diarrea de (NOMBRE)?                                                                                                      | Parásitos intestinales (parasitosis)=1<br>Alimentos sucios e infectados=2  ___ <br>Falta de agua limpia=3<br>Contacto con piso y objetos sucios=4<br>Leche de fórmula=5<br>Contacto con animales o mascotas=6<br>Otro(especificar)=8 _____<br>No sabe=9             |
| 13.10 ¿Cuál fue el tratamiento para la diarrea de (NOMBRE) que le indicaron o recomendaron?<br><br>[REGISTRE HASTA TRES OPCIONES DE RESPUESTA]                           | Suero intravenoso=1<br>Desparasitación=2  ___ <br>Suero de rehidratación oral=3<br>Hidratación en el hogar (aguas, tés, caldos)=4  ___ <br>Continuar con lactancia materna=5<br>Medicamento (antibióticos, etc.)=6  ___ <br>Otro (especificar)=8 _____<br>No sabe=9 |
| 13.11 ¿Quién le indico el tratamiento en el último episodio de diarrea de (NOMBRE)?                                                                                      | Médico o enfermera=1<br>Madre o suegra=2  ___ <br>Conocido o vecino=3<br>Nadie, ella sola=4<br>Lo escuchó o vió en algún medio de comunicación=5<br>Otro=8 (esp) _____<br>No sabe=9                                                                                 |
| 13.12 ¿Por cuánto tiempo se lo indicaron o recomendaron?                                                                                                                 | ___   ___  días<br><br>No sabe o no recuerda = 99                                                                                                                                                                                                                   |
| <b>Leer: "Ahora me gustaría que platicáramos como fue la alimentación de (NOMBRE) durante el episodio de diarrea".</b>                                                   |                                                                                                                                                                                                                                                                     |
| 13.13 Durante el último episodio de diarrea (en los últimos tres meses), ¿le dió a (NOMBRE) lactancia materna?                                                           | Si=1 → <b>Pase a 13.15</b><br>No=2  ___ <br>No sabe=9                                                                                                                                                                                                               |
| 13.14 ¿Por qué no le dió pecho a (NOMBRE) durante el último episodio de diarrea?<br><br>(REGISTRE HASTA TRES OPCIONES DE RESPUESTA)<br><b>(AL TERMINAR PASE A 13.17)</b> | Porque así se lo indicaron en el Centro de Salud=1<br>Porque no aceptaba el pecho=2  ___ <br>Porque tenía sed=3<br>Porque tenía que tomar el tratamiento=4  ___ <br>Porque se quedó hospitalizado=5<br>Otro (especificar)=8 _____  ___ <br>No sabe=9                |
| 13.15 ¿Con qué frecuencia le dió lactancia materna a (NOMBRE) durante el último episodio de diarrea?                                                                     | Igual=1<br>Menos=2  ___ <br>Más que antes de enfermarse=3<br>Otro (especificar)=8 _____<br>No sabe=9                                                                                                                                                                |
| 13.16 ¿Por qué le dió pecho a (NOMBRE) con esa frecuencia durante el último episodio de diarrea?                                                                         | Porque así lo pedía=1<br>Porque así se lo indicaron en el Centro Salud=2  ___ <br>Porque es bueno para el bebé=3<br>Porque no sabía qué hacer=4<br>Otro (especificar)=8 _____<br>No sabe, no responde=9                                                             |
| 13.17 En el centro de salud ¿han desparasitado a (NOMBRE) en los últimos tres meses?                                                                                     | Si=1<br>No=2 } <b>Pase a 13.19</b>  ___ <br>No sabe=9 }                                                                                                                                                                                                             |

|                                                                                                                                                                                              |                                                                                                                                                                                                                                                                                                                                                                                                                                                                                                                                                          |
|----------------------------------------------------------------------------------------------------------------------------------------------------------------------------------------------|----------------------------------------------------------------------------------------------------------------------------------------------------------------------------------------------------------------------------------------------------------------------------------------------------------------------------------------------------------------------------------------------------------------------------------------------------------------------------------------------------------------------------------------------------------|
| 13.18 ¿Cada cuando (nombre) ha recibido tratamiento de desparasitación?                                                                                                                      | Cada 3 meses=1<br>Cada 6 meses=2  __ <br>Cada año=3<br>En la semana nacional de salud=4<br>Otro =8 (especificar) _____<br>No sabe=9                                                                                                                                                                                                                                                                                                                                                                                                                      |
| 13.19 ¿Usted pide o solicita que le den desparasitación a (NOMBRE)?                                                                                                                          | Si=1 → <b>Pase a 13.21</b><br>No=2  __ <br>No sabe=9                                                                                                                                                                                                                                                                                                                                                                                                                                                                                                     |
| 13.20 ¿Por qué no pide o solicita que desparasiten a (NOMBRE)?                                                                                                                               | Porque no lo necesita=1<br>Porque no hay en el centro de salud=2  __ <br>Porque no le gusta al niño(a)=3<br>Porque ha tenido o tiene diarrea=4<br>Otro=8 (especificar) _____<br>No sabe=9                                                                                                                                                                                                                                                                                                                                                                |
| 13.21 ¿Usted usó o ha usado el suero de rehidratación Oral en el último episodio de diarrea?<br><br><b>[Encuestador: puede ser mayor a 3 meses el tiempo del último episodio de diarrea]</b> | Si=1<br>No=2 } <b>Pase a 13.23</b>  __ <br>No sabe=9                                                                                                                                                                                                                                                                                                                                                                                                                                                                                                     |
| 13.22 ¿Qué tipo de suero de rehidratación oral ha utilizado con (NOMBRE)?<br><br><b>[AL TERMINAR PASE A 13.24]</b>                                                                           | Casero=1<br>Vida suero oral (VSO)=2  __ <br>Mezcla de bebidas carbonatadas (sidral+agua mineral)=3<br>Comercial (ej. Suerox, Pedialite)=4<br>Otro=8 (especifique) _____<br>No sabe=9                                                                                                                                                                                                                                                                                                                                                                     |
| 13.23 ¿Por qué no ha usado suero de rehidratación oral?                                                                                                                                      | Porque no lo necesita=1<br>Porque no hay en el centro de salud=2  __ <br>Porque no le gusta al niño(a)=3<br>Porque fue una diarrea leve=4<br>Otro=8 (especifique) _____<br>No sabe=9                                                                                                                                                                                                                                                                                                                                                                     |
| 13.24 ¿Usted sabe preparar <b>Vida Suero Oral (sobre de polvo)</b> ?                                                                                                                         | Si=1<br>No=2 } <b>Pase a 13.26</b>  __ <br>No sabe=9                                                                                                                                                                                                                                                                                                                                                                                                                                                                                                     |
| 13.25 ¿Cómo prepara Vida Suero Oral?                                                                                                                                                         | Disuelves el sobre en 1 lt de agua hervida =1<br>Otra=8 (especifique) _____  __ <br>No sabe=9                                                                                                                                                                                                                                                                                                                                                                                                                                                            |
| 13.26 ¿Usted sabe usar Vida Suero Oral?                                                                                                                                                      | Si=1<br>No=2 } <b>Pase a 13.28</b>  __ <br>No sabe=9                                                                                                                                                                                                                                                                                                                                                                                                                                                                                                     |
| 13.27 ¿Cómo se usa <b>Vida Suero Oral</b> ?<br><br><b>[Utilice código 1=Si; 2=No; 9=No sabe]</b><br><br><i>[Todas las casillas deberán tener dato]</i>                                       | 01. Se checa caducidad.....  __ <br>02. Lo que no se consume en 24 hrs se desecha.....  __ <br>03. Se ofrece de forma continua hasta acabar la dosis (1/2 tacita para <6m y 1 tacita para <1).....  __ <br>04. Se da por cada evacuación .....  __ <br>05. Se da por cada episodio de vómito.....  __ <br>06. Se alterna con lactancia materna .....  __ <br>07. Se introduce fórmula y otros líquidos.....  __ <br>08. Se ofrece a cucharadas o en tacita .....  __ <br>09. Se da cuando hace mucho calor .....  __ <br>88. Otro (especificar).....  __ |
| 13.28 ¿Usted usa (o ha usado <b>biberones o mamilas</b> con sus hijo(a)s) para dar cualquier tipo de líquidos o alimentos?                                                                   | Si =1<br>No=2 } <b>Pase a 13.32</b>  __ <br>No sabe=9                                                                                                                                                                                                                                                                                                                                                                                                                                                                                                    |

|                                                                                                                                                                   |                                                                                                                                                                                                                                                                                                                                                                                                                                               |                             |
|-------------------------------------------------------------------------------------------------------------------------------------------------------------------|-----------------------------------------------------------------------------------------------------------------------------------------------------------------------------------------------------------------------------------------------------------------------------------------------------------------------------------------------------------------------------------------------------------------------------------------------|-----------------------------|
| 13.29 ¿Alguien le ha hablado sobre los riesgos de usar el biberón/mamila para alimentar a su hijo(a)?                                                             | Si=1<br>No=2<br>No sabe=9 } <b>pase a 13.32</b>                                                                                                                                                                                                                                                                                                                                                                                               | __                          |
| 13.30 ¿Cuáles son los riesgos que conoce sobre el uso de biberones/mamilas para el niño(a)?<br><br>[REGISTRE HASTA TRES OPCIONES DE RESPUESTA]                    | Se acostumbra el bebé=01<br>Deforma o pica los dientes=02<br>Ninguno, está bien usarlo=03<br>Reflujo y riesgo de ahogamiento=04<br>Difícil lavado y guarda microorganismos =05<br>Mayor riesgo de diarreas=06<br>Mayor riesgo de parasitosis=07<br>Se sobrealimenta (lo hace más grande o gordito)=08<br>Se puede ahogar porque sale mucho líquido=09<br>Les entra aire al estómago (cólicos)=10<br>Otro=88 (especificar) _____<br>No sabe=99 | __ __ <br> __ __ <br> __ __ |
| 13.31 De lo que me acaba de mencionar, ¿Cuál considera lo más importante?<br><i>[Si sólo menciona una repita el código]</i>                                       |                                                                                                                                                                                                                                                                                                                                                                                                                                               | __ __                       |
| 13.32 ¿Usted usa (o ha usado) chupones con sus hijo(a)(s) para dar cualquier tipo de líquidos o alimentos?                                                        | Si =1<br>No=2<br>No sabe=9 } <b>pase a 13.36</b>                                                                                                                                                                                                                                                                                                                                                                                              | __                          |
| 13.33 ¿Usted sabe si el uso de chupones puede tener riesgos para el bebé?                                                                                         | Si =1<br>No=2<br>No sabe=9 } <b>pase a 13.36</b>                                                                                                                                                                                                                                                                                                                                                                                              | __                          |
| 13.34 ¿Cuáles riesgos conoce sobre el uso de chupones durante los primeros meses de vida?<br><br>[REGISTRE LAS PRIMERAS TRES OPCIONES QUE MENCIONÉ EL ENCUESTADO] | Se acostumbra al bebé=01<br>Deforma o pican los dientes=02<br>Ninguno, está bien usarlo=03<br>Reflujo y riesgo de ahogamiento=04<br>Difícil lavado y guarda microorganismos =05<br>Mayor riesgo de diarreas=06<br>Mayor riesgo de parasitosis=07<br>Les entra aire al estómago (cólicos)=08<br>Otro=88 (especificar) _____<br>No sabe=99                                                                                                      | __ __ <br> __ __ <br> __ __ |
| 13.35 De lo que me acaba de mencionar, ¿Cuál considera lo más importante?<br><i>[Si sólo menciona una repita el código]</i>                                       |                                                                                                                                                                                                                                                                                                                                                                                                                                               | __ __                       |
| <b>Leer: “Ahora quiero que me platique lo que hace en su hogar para prevenir enfermedades del estómago”.</b>                                                      |                                                                                                                                                                                                                                                                                                                                                                                                                                               |                             |
| 13.36 ¿Qué hace Usted para cuidar a sus hijo(a)(s) para que no se enfermen de diarrea?<br><br>[REGISTRE HASTA TRES OPCIONES DE RESPUESTA]                         | Lavado de manos=1<br>Lavado de frutas y verduras (agua y jabón)=2<br>Desinfección de frutas y verduras (ej. con yodo)=3<br>Hervor de agua y/o leche=4<br>Cocimiento de carnes y pescados=5<br>Alimentos refrigerados=6<br>Cubrir alimentos y almacenar=7<br>Otro=8 (especificar) _____<br>No sabe=9                                                                                                                                           | __ <br> __ <br> __          |
| 13.37 De lo que me acaba de mencionar, para Usted ¿qué es lo más importante?<br><i>[Si sólo menciona una repita el código]</i>                                    |                                                                                                                                                                                                                                                                                                                                                                                                                                               | __                          |

| 14. Sección salud física y mental y valores de la mujer embarazada o madre del menor de 2 años<br>[APLICAR A TODAS LAS MUJERES]<br>"Ahora me gustaría comentar un poco con Usted sobre cómo se encuentra en la actualidad, en relación a su salud física". |                                                                                                                                                                                                                                                                                |
|------------------------------------------------------------------------------------------------------------------------------------------------------------------------------------------------------------------------------------------------------------|--------------------------------------------------------------------------------------------------------------------------------------------------------------------------------------------------------------------------------------------------------------------------------|
| 14.1 ¿Cómo considera su peso actual?                                                                                                                                                                                                                       | Bajo peso=1<br>Normal=2  __ <br>Sobrepeso=3<br>Con obesidad=4<br>Otro=8 (especificar) _____<br>No sabe=9                                                                                                                                                                       |
| [APLIQUE SI LA ENCUESTADA REFIERE TENER PAREJA O ESPOSO, DE LO CONTRARIO PASE A PREG. 14.4]<br><br>14.2 ¿Le comenta algo su pareja o esposo sobre su cuerpo o como se ve?                                                                                  | Si=1<br>No=2 } <b>Pase a 14.4</b><br>No sabe=9  __                                                                                                                                                                                                                             |
| 14.3 ¿Qué le comenta su <b>pareja /esposo</b> ?<br><br>[Utilice código 1=Si; 2=No; 9=No sabe]<br><br>[Todas las casillas deberán tener dato]                                                                                                               | 1. Que estoy con bajo peso.....  __ <br>2. Que tengo que ganar más peso.....  __ <br>3. Que estoy bien.....  __ <br>4. Que tengo que hacer ejercicio.....  __ <br>5. Que me debo de cuidar.....  __ <br>6. Que estoy ganando peso.....  __ <br>8. Otro (especificar) _____  __ |
| 14.4 ¿Cuál es su peso actual (auto-reporte)?                                                                                                                                                                                                               | Peso  __   __   __   __  kgs<br><br>No sabe/no recuerda=999.9                                                                                                                                                                                                                  |
| <b>Encuestador: Este renglón se contesta por observación de Usted".</b>                                                                                                                                                                                    |                                                                                                                                                                                                                                                                                |
| 14.4.1- Sobrepeso aparente  __ <br>14.4.2- Obesidad aparente  __ <br>[Utilice código 1=Si; 2=No; 9=No sabe]                                                                                                                                                |                                                                                                                                                                                                                                                                                |
| 14.5 ¿Algún médico le ha diagnosticado alguna enfermedad crónica?                                                                                                                                                                                          | Si=1<br>No=2 → <b>Pase a 14.9</b>  __                                                                                                                                                                                                                                          |
| 14.6 ¿Cuál enfermedad le han diagnosticado?<br><br>[Utilice código 1=Si; 2=No; 9=No sabe]<br><br>[Todas las casillas deberán tener dato]                                                                                                                   | Hipertensión o presión alta=1 .....( )<br>Diabetes o azúcar alta en sangre=2 .....( )<br>Colesterol alto=3.....( )<br>Triglicéridos altos=4 .....( )<br>Otro =8 (especificar) _____ ( )<br>No sabe=9 .....( )                                                                  |
| 14.7 ¿Actualmente está tomando algún medicamento para bajar o controlar su enfermedad?                                                                                                                                                                     | Si=1<br>No=2 → <b>Pase a 14.9</b>  __                                                                                                                                                                                                                                          |
| 14.8 ¿Cómo se llama el medicamento?<br><br>[Solicite que se lo muestren, si es posible]<br><br>(NO SABE /NO RECUERDA= escribir en la línea NINGUNO)                                                                                                        | 1 = (esp) _____<br>2= (esp) _____<br>3 = (esp) _____<br>4 = (esp) _____<br>5 = (esp) _____                                                                                                                                                                                     |

Leer: "Por último, me gustaría que platicáramos sobre lo que más valora en la vida o lo que le angustia".

[NO LEER, NI SUGERIR RESPUESTAS, REGISTRE LA(S) QUE MENCIONE EL ENCUESTADO]

14.9 ¿Qué es lo más importante para Usted en general (familia, la vida)?

[Utilice código 1=Si; 2=No; 9=No sabe]

[Todas las casillas deberán tener dato]

1. La salud..... |\_\_|
2. La seguridad..... |\_\_|
3. Mejoría en cuestiones económicas..... |\_\_|
4. La familia..... |\_\_|
5. Lo(s)(as) hijos(as)..... |\_\_|
6. Trabajo ..... |\_\_|
7. Educación de los hijos(a)(s)..... |\_\_|
8. Otro(especificar)..... |\_\_|

14.10 ¿Qué es lo más importante para Usted con respecto a su bebé (hijo(a) <2 años)?

[Utilice código 1=Si; 2=No; 9=No sabe]

[Todas las casillas deberán tener dato]

01. Seguridad..... |\_\_|
02. Que crezca sano y fuerte..... |\_\_|
03. Que no se enferme..... |\_\_|
04. Que sea inteligente..... |\_\_|
05. Que vaya a la escuela..... |\_\_|
06. Que no los maltraten (violencia domestica)..... |\_\_|
07. Su salud..... |\_\_|
08. Su alimentación..... |\_\_|
09. Su desarrollo (ej. habla)..... |\_\_|
88. Otro(especificar)..... |\_\_|

14.11 ¿Qué es lo más importante para Usted como persona, como mujer?

[Utilice código 1=Si; 2=No; 9=No sabe]

[Todas las casillas deberán tener dato]

1. Estar sana..... |\_\_|
2. No ser una carga para mi familia..... |\_\_|
3. No enfermarme para no gastar..... |\_\_|
4. Sentirse bien (auto-estima)..... |\_\_|
5. Que no me maltraten (violencia doméstica)..... |\_\_|
6. Poder cuidar a mi familia..... |\_\_|
8. Otro (especificar)..... |\_\_|

14.12 ¿Qué hace Usted para mantener su salud?

[Utilice código 1=Si; 2=No; 9=No sabe]

[Todas las casillas deberán tener dato]

01. Hacer ejercicio..... |\_\_|
02. Comer saludable (ej. comer frutas y verduras)... |\_\_|
03. No comer comida chatarra (ej. frituras, etc.)..... |\_\_|
04. No tomar refresco..... |\_\_|
05. Estar sana..... |\_\_|
06. No ser una carga para mi familia..... |\_\_|
- 07.No enfermarme para no gastar..... |\_\_|
08. Checarse frecuentemente con el médico..... |\_\_|
88. Otro (especificar)..... |\_\_|

14.13 ¿Qué le pone triste o le angustia con respecto a su familia o hijos?

[Utilice código 1=Si; 2=No; 9=No sabe]

[Todas las casillas deberán tener dato]

01. Seguridad..... |\_\_|
02. Preocupaciones económicas..... |\_\_|
03. Dejar a sus hijos solos..... |\_\_|
04. No ser buena madre/esposa..... |\_\_|
05. Que no se enferme(n)..... |\_\_|
06. No tener para darles de comer..... |\_\_|
07. Educación de su(s) hijo(a)(s)..... |\_\_|
08. Dar (les) estabilidad familiar..... |\_\_|
09. Que no los maltraten (violencia domestica)..... |\_\_|
88. Otro (especificar)..... |\_\_|

|                                                                                                                                                                                                           |                                                                                                                                                                                                                                                                                                                                                                                                                                            |
|-----------------------------------------------------------------------------------------------------------------------------------------------------------------------------------------------------------|--------------------------------------------------------------------------------------------------------------------------------------------------------------------------------------------------------------------------------------------------------------------------------------------------------------------------------------------------------------------------------------------------------------------------------------------|
| 14.14 ¿Qué le puede motivar a Usted si se le pide que haga algún <b>cambio</b> para mejorar su alimentación?<br><br>[Utilice código 1=Si; 2=No; 9=No sabe]<br><br>[Todas las casillas deberán tener dato] | 1. Mejorar salud.....  __ <br>2. Mi peso corporal.....  __ <br>3. Apariencia física.....  __ <br>4. Por enfermedad.....  __ <br>5. Mejor economía.....  __ <br>6. Salud de su familia.....  __ <br>7. Sentirse bien (auto-estima).....  __ <br>8. Otro (especificar).....  __                                                                                                                                                              |
| 14.15 ¿Qué <b>podría impedir</b> que Usted y/o su familia lleven una alimentación saludable?<br><br>[Utilice código 1=Si; 2=No; 9=No sabe]<br><br>[Todas las casillas deberán tener dato]                 | 01. Nada.....  __ <br>02. Costos.....  __ <br>03. Preparación complicada.....  __ <br>04. Recomendaciones difíciles de cumplir.....  __ <br>05. No le(s) gustan las verduras.....  __ <br>06. No tiene disponibles alimentos sanos.....  __ <br>07. No sabe qué comer.....  __ <br>08. El gusto por ciertos alimentos.....  __ <br>09. No tener tiempo para preparar los alimentos ella misma.....  __ <br>88. Otro (especificar).....  __ |
| <b>[APLIQUE A MUJERES EMBARAZADAS DE CONSULTA PRENATAL Y MADRES DE NIÑOS MENORES DE 6 MESES]</b>                                                                                                          |                                                                                                                                                                                                                                                                                                                                                                                                                                            |
| 14.16 Durante el último mes, ¿ha estado molesta a menudo o frecuentemente por sentirse triste, deprimido o sin esperanza?                                                                                 | Si=1<br>No=2  __ <br>No sabe=9                                                                                                                                                                                                                                                                                                                                                                                                             |
| 14.17 Durante el último mes, ¿a menudo se ha sentido molesta por tener poco interés o placer en hacer las cosas?                                                                                          | Si=1<br>No=2  __ <br>No sabe=9                                                                                                                                                                                                                                                                                                                                                                                                             |
| <b>[Aplique si respondió "Si" a cualquiera de las dos preguntas anteriores]</b><br>14.18 Con respecto a lo que Usted siente, ¿necesita o quiere ayuda?                                                    | Si=1  __ <br>No=2<br>No sabe=9                                                                                                                                                                                                                                                                                                                                                                                                             |

|                                                                                       |
|---------------------------------------------------------------------------------------|
| <b>15.1 IDENTIFICADOR DE LA PAREJA/ESPOSO DE LA MUJER ENCUESTADA</b>                  |
| <b>15.2 IDENTIFICADOR DEL CUESTIONARIO DE LA PAREJA/ESPOSO DE LA MUJER ENCUESTADA</b> |
| Folio de la persona: .....  __ __ __ __ __                                            |
| Número progresivo del cuestionario:.....  __ __ __ __                                 |
| <b>ANOTE 99999 EN CASO QUE NO CORRESPONDA CON NINGÚN HOMBRE ENCUESTADO.</b>           |

|                      |
|----------------------|
| <b>OBSERVACIONES</b> |
|                      |
|                      |
|                      |
|                      |
|                      |
|                      |

**EVALUACIÓN DE LA INFORMACIÓN**

| PREGUNTA                                                                          | RESPUESTA                                                        |   |
|-----------------------------------------------------------------------------------|------------------------------------------------------------------|---|
| DURANTE LA ENTREVISTA, ¿LA INFORMANTE ENTENDIÓ A LAS PREGUNTAS QUE USTED LE HIZO? | SI.....1<br>NO.....2                                             | _ |
| ¿QUÉ TAN CONFIABLES LE PARECIERON LAS RESPUESTAS DE LA ENTREVISTADA?              | MUY CONFIABLES.....1<br>REGULAR.....2<br>POCO CONFIABLES.....3   | _ |
| DURANTE EL TRANSCURSO DE LA ENTREVISTA, LA ENTREVISTADA SE MOSTRÓ:                | INTERESADO.....1<br>POCO INTERESADO.....2<br>NO INTERESADO.....3 | _ |
